# Supplementary material for: Development of a chemical scaffold for inhibiting nonribosomal peptide synthetases in live bacterial cells
Source: publisher site journal article supplement (doi:10.3762/bjoc.20.39), 2024-02-26

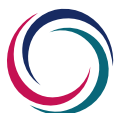

## Supporting Information

for

### Development of a chemical scaffold for inhibiting nonribosomal peptide synthetases in live bacterial cells

Fumihiko Ishikawa, Sho Konno, Hideaki Takeya and Genzoh Tanabe

*Beilstein J. Org. Chem.* **2024**, *20*, 445–451. doi:10.3762/bjoc.20.39

### Additional Figures, experimental part and NMR spectra

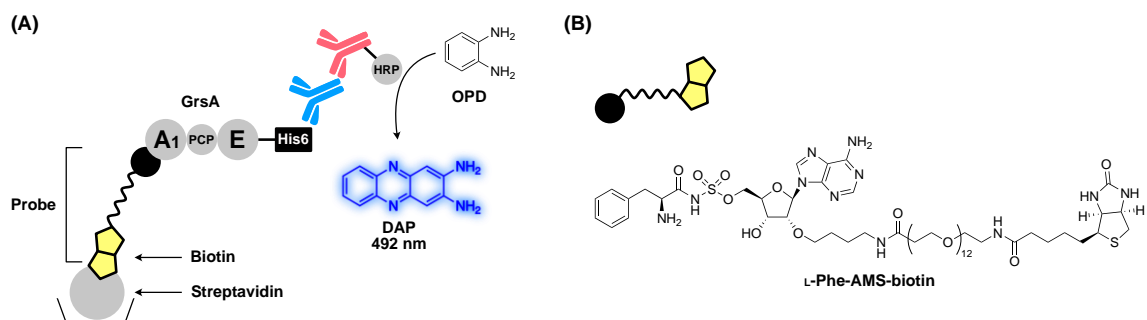

**Figure S1. (A) Enzyme-linked immunosorbent assay (ELISA) for the binding of adenylation domains of nonribosomal peptide synthetases.<sup>1,2,3</sup> (B) A structure of the chemical probe described in this ELISA protocol.<sup>1,2,3</sup>**

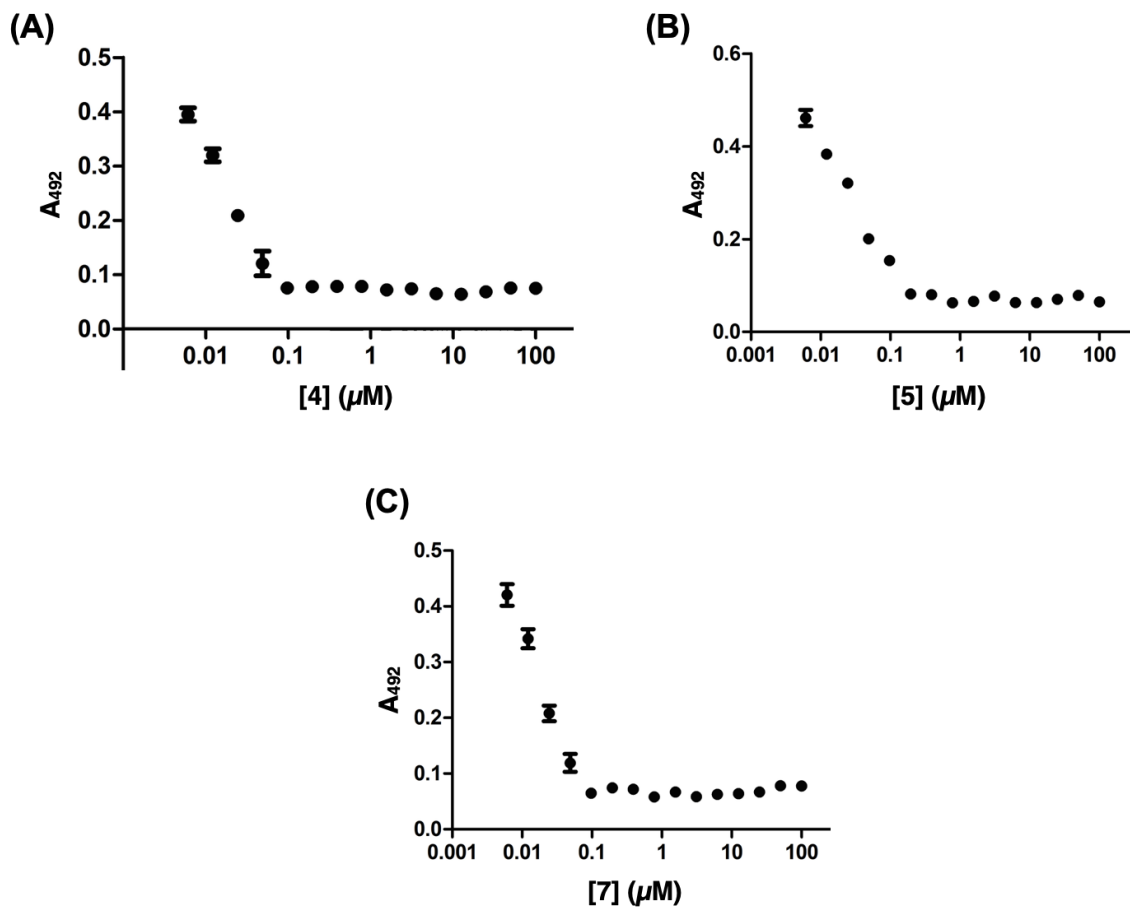

**Figure S2. Binding of GrsA with (A) inhibitor 4, (B) inhibitor 5, and (C) inhibitor 7 by competitive ELISA with L-Phe-AMS-biotin.** Streptavidin-coated wells treated with L-Phe-AMS-biotin (1.5  $\mu\text{g}/\text{mL}$ ) were incubated with GrsA (0.875  $\mu\text{g}/\text{mL}$ , 6.89 nM) in either the absence or presence of inhibitor 4 (6.1 nM–100  $\mu\text{M}$ ), 5 (6.1 nM–100  $\mu\text{M}$ ), or 7 (6.1 nM–100  $\mu\text{M}$ ).

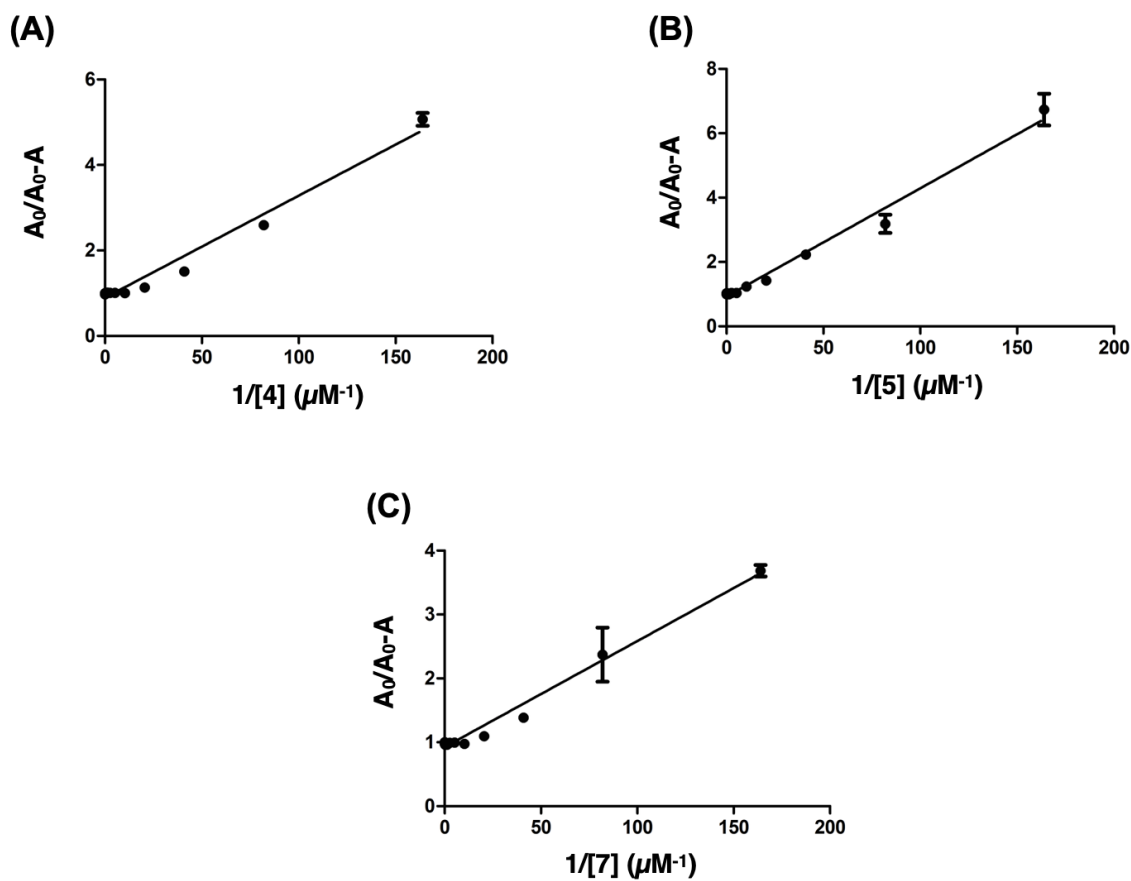

**Figure S3. Klotz plots to determine  $K_d$  values of GrsA with (A) inhibitor 4, (B) inhibitor 5, and (C) inhibitor 7.** The results were analyzed by a Klotz plot (a double reciprocal plot of the inhibition concentration vs the ratio of inhibitor-bound enzyme to the total added enzyme) and the slope of the line yielding the  $K_d$  for the probe. All assays were performed in duplicates.

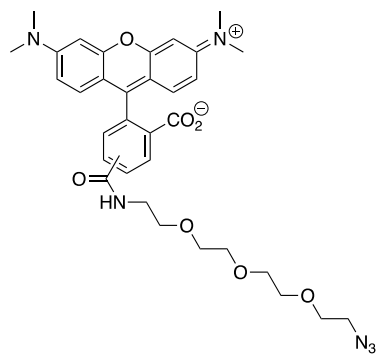

**Figure S4. Structure of TAMRA-N<sub>3</sub>.**

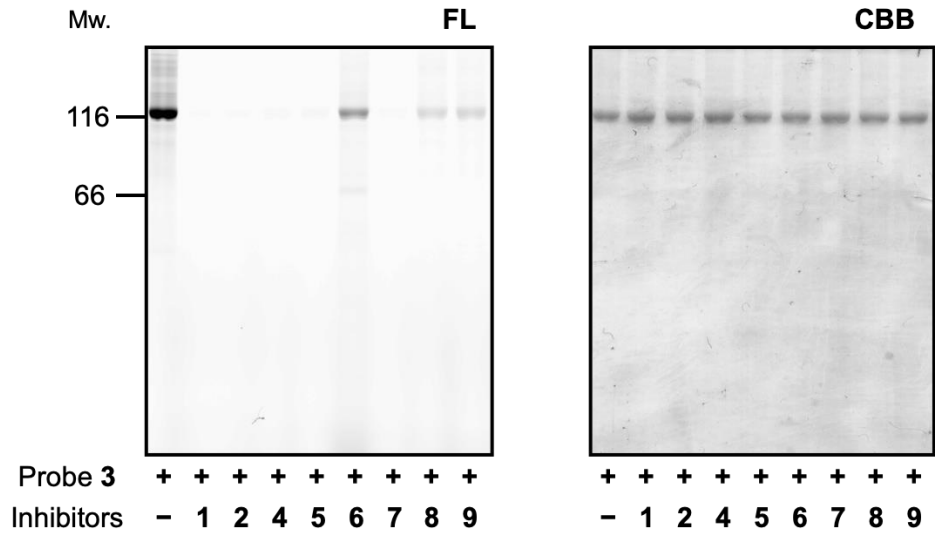

Figure S5. Full gel image of Figure 4A.

## Chemical synthetic procedures

**General synthetic methods:** All commercial reagents were used as provided unless otherwise indicated. Compounds **1**<sup>4</sup>, **2**<sup>2</sup>, **3**<sup>5</sup>, **6**<sup>2</sup>, **8**<sup>2</sup>, **9**<sup>2</sup>, **10a–12a**<sup>6</sup>, and **10b**<sup>7</sup> were known compounds. These compounds were prepared according to published literature procedures. All reactions were carried out under an atmosphere of nitrogen in dry solvents with oven-dried glassware and constant magnetic stirring unless otherwise noted. <sup>1</sup>H NMR spectra were recorded at 500 MHz. <sup>13</sup>C NMR spectra were recorded at 125 MHz on JEOL NMR spectrometers and standardized to the NMR solvent signal as reported by Gottlieb.<sup>8</sup> Multiplicities are given as s = singlet, d = doublet, t = triplet, q = quartet, dd = doublet of doublets, ddd = doublet of triplets, br = broad signal, m = multiplet using integration and coupling constant in Hertz. TLC analysis was performed using Silica Gel 60 F254 plates (Merck) and visualization was accomplished with ultraviolet light ( $\lambda = 254$  nm) and/or the appropriate stain [phosphomolybdic acid, iodine, ninhydrin, and potassium permanganate]. Silica gel chromatography was carried out with SiliaFlash F60 230-400 mesh (Silicycle), according to the method of Still.<sup>9</sup> Mass spectral data were obtained using a LCMS-IT-TOF mass spectrometer (Shimadzu).

### 2-(((2*R*,3*R*,4*R*,5*R*)-2-(6-Amino-9*H*-purin-9-yl)-4-hydroxy-5-(hydroxymethyl)tetrahydrofuran-3-yl)oxy)acetonitrile (**10d**)

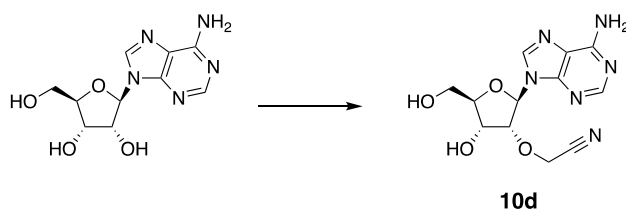

NaH (180 mg of a 60% suspension in mineral oil, 4.49 mmol) was added to the solution of adenosine (1.00 g, 3.75 mmol) in DMF (30 mL). The solution was stirred at 0 °C for 30 min and bromoacetonitrile (275  $\mu$ L, 4.13 mmol) and TBAI (277 mg, 0.75 mmol) were added. The reaction mixture was stirred at room temperature for 9 h. The mixture was evaporated to dryness. The residue was purified by flash chromatography (20:1 to 10:1 CHCl<sub>3</sub>/MeOH) to afford compound **10d** as a white solid (242 mg, 21%). <sup>1</sup>H NMR (500 MHz, Methanol-*d*<sub>4</sub>)  $\delta$  8.64 (s, 1H), 8.42 (s, 1H), 6.22 (d, *J* = 4.4 Hz, 1H), 4.67 – 4.51 (m, 4H), 4.20 – 4.13 (m, 1H), 3.91 (dd, *J* = 12.4, 2.8 Hz, 1H), 3.80 (dd, *J* = 12.4, 3.2 Hz, 1H). <sup>13</sup>C NMR (125 MHz, Methanol-*d*<sub>4</sub>)  $\delta$  152.1, 149.5, 145.7, 143.6, 120.4, 117.3, 88.5, 87.4, 84.3, 70.3, 62.0, 57.0. HRMS (ESI<sup>-</sup>): [M-H]<sup>-</sup> calcd for C<sub>12</sub>H<sub>13</sub>N<sub>6</sub>O<sub>4</sub>, 305.0998; found, 305.0991.

**9-((2*R*,3*R*,4*R*,5*R*)-3-(Benzyloxy)-4-((*tert*-butyldimethylsilyl)oxy)-5-(((*tert*-butyldimethylsilyl)oxy)methyl)tetrahydrofuran-2-yl)-9*H*-purin-6-amine (11b)**

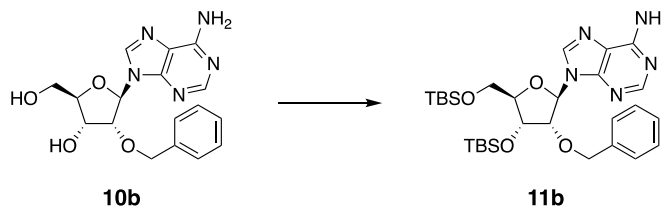

To a solution of compound **10b** (200 mg, 0.56 mmol), imidazole (228 mg, 3.36 mmol) and DMAP (10.0 mg, 0.08 mmol) in DMF (6 mL) was added TBSCl (211 mg, 1.40 mmol) at 0 °C. The solution was stirred at room temperature for 16 h. The reaction mixture was diluted with EtOAc. The mixture was washed with 5% citric acid, 5% NaHCO<sub>3</sub>, and brine. The organic layer was dried over Na<sub>2</sub>SO<sub>4</sub> and evaporated to dryness. The residue was purified by flash chromatography (50:1 CHCl<sub>3</sub>/MeOH) to afford compound **11b** as a white solid (255 mg, 78%). <sup>1</sup>H NMR (500 MHz, CDCl<sub>3</sub>) δ 8.39 (s, 1H), 8.09 (s, 1H), 6.42 (s, 2H), 6.25 (d, *J* = 4.3 Hz, 1H), 4.76 (d, *J* = 12.1 Hz, 1H), 4.67 (d, *J* = 12.1 Hz, 1H), 4.57 (t, *J* = 4.8 Hz, 1H), 4.45 (t, *J* = 4.5 Hz, 1H), 4.24 – 4.17 (m, 1H), 4.04 (dd, *J* = 11.4, 3.8 Hz, 1H), 3.82 (dd, *J* = 11.5, 2.8 Hz, 1H), 0.97 (s, 9H), 0.96 (s, 9H), 0.15 – 0.12 (m, 12H). <sup>13</sup>C NMR (125 MHz, CDCl<sub>3</sub>) δ 155.7, 152.9, 149.6, 139.2, 137.2, 128.3, 127.9, 127.8, 120.0, 86.8, 85.2, 80.7, 77.3, 77.0, 76.8, 72.2, 70.0, 62.0, 26.0, 25.7, 18.5, 18.1, -4.6, -4.9, -5.4, -5.5. HRMS (ESI<sup>-</sup>): [M-H]<sup>-</sup> calcd for C<sub>29</sub>H<sub>46</sub>N<sub>5</sub>O<sub>4</sub>Si<sub>2</sub>, 584.3088; found, 584.3097.

**2-(((2*R*,3*R*,4*R*,5*R*)-2-(6-Amino-9*H*-purin-9-yl)-4-((*tert*-butyldimethylsilyl)oxy)-5-(((*tert*-butyldimethylsilyl)oxy)methyl)tetrahydrofuran-3-yl)oxy)acetonitrile (11d)**

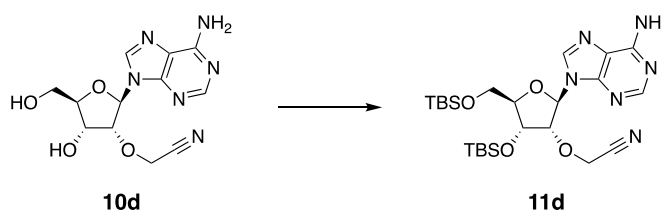

To a solution of compound **10d** (117 mg, 0.38 mmol), imidazole (155 mg, 2.28 mmol) and DMAP (7.3 mg, 0.06 mmol) in DMF (4 mL) was added TBSCl (143 mg, 0.95 mmol) at 0 °C. The solution was stirred at room temperature for 11 h. The reaction mixture was diluted with EtOAc. The mixture was washed with 5% citric acid, 5% NaHCO<sub>3</sub>, and brine. The organic layer was dried over Na<sub>2</sub>SO<sub>4</sub> and evaporated to dryness. The residue was purified by flash chromatography (100:1 CHCl<sub>3</sub>/MeOH) to afford compound **11d** as a white solid (127 mg, 62%). <sup>1</sup>H NMR (500 MHz, CDCl<sub>3</sub>) δ 8.31 (s, 1H), 8.15 (s, 1H), 6.50 (s, 2H), 6.11 (d, *J* = 3.3 Hz, 1H), 4.64 – 4.55 (m, 1H),



4.57 – 4.49 (m, 3H), 4.13 – 4.05 (m, 1H), 3.99 (dd,  $J = 11.7, 3.1$  Hz, 1H), 3.76 (dd,  $J = 11.6, 2.6$  Hz, 1H), 0.91 (s, 9H), 0.90 (s, 9H), 0.13 (s, 3H), 0.11 (s, 3H), 0.084 (s, 3H), 0.078 (s, 3H).  $^{13}\text{C}$  NMR (125 MHz,  $\text{CDCl}_3$ )  $\delta$  155.8, 153.1, 149.2, 138.8, 120.1, 115.5, 86.7, 84.5, 82.3, 69.6, 61.3, 55.7, 25.9, 25.6, 18.4, 18.0, -4.6, -4.9, -5.5. HRMS (ESI $^-$ ):  $[\text{M}-\text{H}]^-$  calcd for  $\text{C}_{24}\text{H}_{41}\text{N}_6\text{O}_4\text{Si}_2$ , 533.2728; found, 533.2755.

**((2*R*,3*R*,4*R*,5*R*)-5-(6-Amino-9*H*-purin-9-yl)-4-(benzyloxy)-3-((*tert*-butyldimethylsilyl)oxy)tetrahydrofuran-2-yl)methanol (12b)**

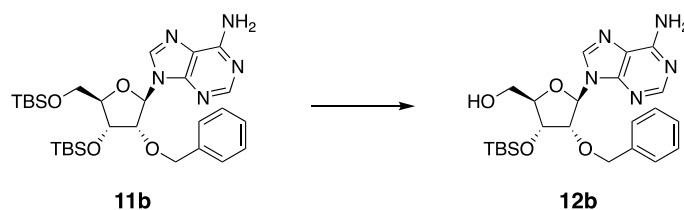

Compound **11b** (200 mg, 0.34 mmol) was dissolved in a 1:1 (v/v) mixture of a 50% aqueous solution of TFA (2mL) and THF (2 mL) at 0 °C. After 6 h, the flask was placed on the rotary evaporator and the TFA, THF and  $\text{H}_2\text{O}$  were removed at reduced pressure. The residue was purified by flash chromatography (100:1 to 50:1  $\text{CHCl}_3/\text{MeOH}$ ) to afford compound **12b** as a white solid (123 mg, 77%).  $^1\text{H}$  NMR (500 MHz,  $\text{CDCl}_3$ )  $\delta$  8.12 (s, 1H), 7.75 (s, 1H), 7.03 – 6.95 (m, 3H), 6.93 (dt,  $J = 6.4, 1.8$  Hz, 2H), 6.72 (d,  $J = 11.7$  Hz, 1H), 6.47 (s, 2H), 5.83 (d,  $J = 7.9$  Hz, 1H), 4.75 (dd,  $J = 8.0, 4.5$  Hz, 1H), 4.61 – 4.55 (m, 2H), 4.22 – 4.12 (m, 2H), 3.89 (dd,  $J = 13.1, 1.6$  Hz, 1H), 3.76 – 3.65 (m, 1H), 0.94 (s, 9H), 0.15 (s, 3H), 0.14 (s, 3H).  $^{13}\text{C}$  NMR (125 MHz,  $\text{CDCl}_3$ )  $\delta$  156.0, 151.8, 148.1, 140.6, 136.7, 127.8, 127.7, 127.6, 121.1, 89.9, 89.2, 78.7, 72.4, 71.7, 63.0, 25.8, 18.2, -4.6, -4.9. HRMS (ESI $^-$ ):  $[\text{M}-\text{H}]^-$  calcd for  $\text{C}_{23}\text{H}_{41}\text{N}_5\text{O}_4\text{Si}$ , 470.2224; found, 470.2223.

**2-(((2*R*,3*R*,4*R*,5*R*)-2-(6-Amino-9*H*-purin-9-yl)-4-((*tert*-butyldimethylsilyl)oxy)-5-(hydroxymethyl)tetrahydrofuran-3-yl)oxy)acetonitrile (12d)**

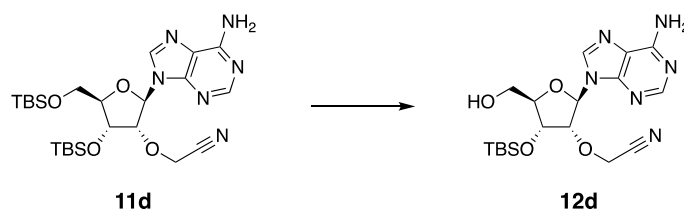

Compound **11d** (100 mg, 0.19 mmol) was dissolved in a 1:1 (v/v) mixture of a 50% aqueous solution of TFA (2mL) and THF (2 mL) at 0 °C. After 6 h, the flask was placed on the rotary

evaporator and the TFA, THF and H<sub>2</sub>O were removed at reduced pressure. The residue was purified by flash chromatography (100:1 to 50:1 CHCl<sub>3</sub>/MeOH) to afford compound **12d** as a white solid (77 mg, 96%). <sup>1</sup>H NMR (500 MHz, CDCl<sub>3</sub>) δ 8.27 (s, 1H), 7.88 (s, 1H), 6.54 (s, 2H), 5.92 (d, *J* = 7.4 Hz, 1H), 4.90 (dd, *J* = 7.3, 4.6 Hz, 1H), 4.61 (dd, *J* = 4.6, 1.1 Hz, 1H), 4.24 – 4.18 (m, 2H), 4.13 (d, *J* = 15.8 Hz, 1H), 3.93 (dd, *J* = 13.2, 1.7 Hz, 1H), 3.71 (d, *J* = 13.1 Hz, 1H), 0.93 (s, 9H), 0.13 (s, 3H), 0.12 (s, 3H). <sup>13</sup>C NMR (125 MHz, CDCl<sub>3</sub>) δ 156.3, 152.5, 148.5, 140.6, 121.1, 115.1, 89.3, 88.8, 81.5, 71.4, 62.6, 55.9, 25.7, 18.1, -4.6, -4.8. HRMS (ESI<sup>-</sup>): [M-H]<sup>-</sup> calcd for C<sub>18</sub>H<sub>27</sub>N<sub>6</sub>O<sub>4</sub>S, 419.1863; found, 419.1865.

**((2*R*,3*R*,4*R*,5*R*)-5-(6-Amino-9*H*-purin-9-yl)-3-((*tert*-butyldimethylsilyl)oxy)-4-methoxytetrahydrofuran-2-yl)methyl sulfamate (13a)**

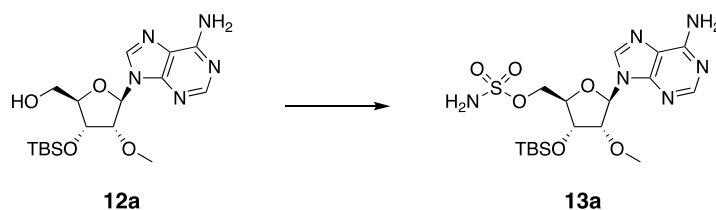

NaH (18.0 mg of a 60 % suspension in mineral oil, 0.45 mmol) was added to a solution of compound **12a** (120 mg, 0.30 mmol) in DME (3 mL). The solution was stirred at 0 °C for 30 min and sulfamoyl chloride (52 mg, 0.45 mmol) was added. The reaction mixture was stirred at room temperature for 3 h. The reaction was quenched with MeOH (10 mL) and the mixture was evaporated to dryness. The residue was purified by flash chromatography (40:1 to 10:1 CHCl<sub>3</sub>/MeOH) to afford compound **13a** as a white solid (122 mg, 86%). <sup>1</sup>H NMR (500 MHz, Methanol-*d*<sub>4</sub>) δ 8.30 (s, 1H), 8.21 (s, 1H), 6.14 (d, *J* = 5.0 Hz, 1H), 4.66 (t, *J* = 4.5 Hz, 1H), 4.48 – 4.36 (m, 2H), 4.36 – 4.24 (m, 2H), 3.42 (s, 3H), 0.94 (s, 9H), 0.16 (s, 3H), 0.15 (s, 3H). <sup>13</sup>C NMR (125 MHz, Methanol-*d*<sub>4</sub>) δ 157.2, 154.0, 150.5, 140.9, 120.4, 87.9, 84.1, 84.1, 79.4, 71.9, 69.0, 58.9, 26.2, 18.9, -4.6, -4.7. HRMS (ESI<sup>-</sup>): [M-H]<sup>-</sup> calcd for C<sub>17</sub>H<sub>29</sub>N<sub>6</sub>O<sub>6</sub>SSi, 473.1639; found, 473.1622.

**((2*R*,3*R*,4*R*,5*R*)-5-(6-Amino-9*H*-purin-9-yl)-4-(benzyloxy)-3-((*tert*-butyldimethylsilyl)oxy)tetrahydrofuran-2-yl)methyl sulfamate (13b)**

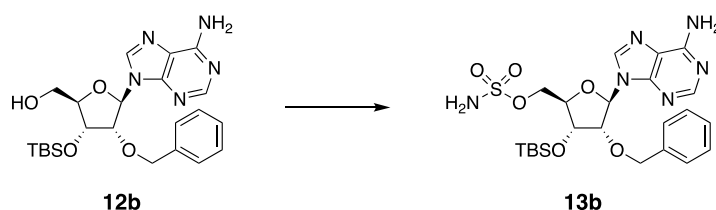

NaH (15.0 mg of a 60 % suspension in mineral oil, 0.38 mmol) was added to a solution of compound **12b** (120 mg, 0.25 mmol) in DME (3 mL). The solution was stirred at 0 °C for 30 min and sulfamoyl chloride (44 mg, 0.38 mmol) was added. The reaction mixture was stirred at room temperature for 3 h. The reaction was quenched with MeOH (10 mL) and the mixture was evaporated to dryness. The residue was purified by flash chromatography (50:1 to 20:1 CHCl<sub>3</sub>/MeOH) to afford compound **13b** as a white solid (112 mg, 81%). <sup>1</sup>H NMR (500 MHz, Methanol-*d*<sub>4</sub>) δ 8.15 (s, 1H), 8.11 (s, 1H), 7.11 (s, 5H), 6.17 – 6.10 (m, 1H), 4.70 – 4.61 (m, 3H), 4.50 – 4.37 (m, 2H), 4.32 (dt, *J* = 5.0, 3.7 Hz, 2H), 0.96 (s, 9H), 0.18 (s, 3H), 0.15 (s, 3H). <sup>13</sup>C NMR (125 MHz, Methanol-*d*<sub>4</sub>) δ 157.2, 153.7, 150.4, 141.0, 138.6, 129.1, 129.0, 128.8, 120.4, 88.0, 84.8, 81.5, 73.7, 72.4, 69.2, 26.3, 19.0, -4.4, -4.8. HRMS (ESI<sup>-</sup>): [M-H]<sup>-</sup> calcd for C<sub>23</sub>H<sub>33</sub>N<sub>6</sub>O<sub>6</sub>SSi, 549.1952; found, 549.1960.

**((2*R*,3*R*,4*R*,5*R*)-5-(6-Amino-9*H*-purin-9-yl)-3-((*tert*-butyldimethylsilyl)oxy)-4-(cyanomethoxy)tetrahydrofuran-2-yl)methyl sulfamate (13d)**

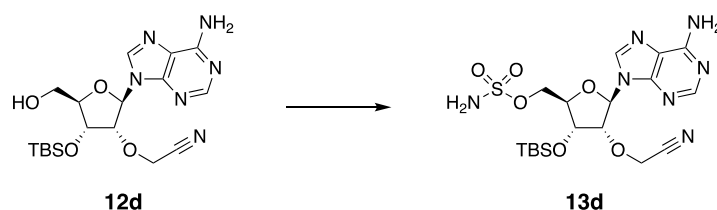

NaH (11.0 mg of a 60 % suspension in mineral oil, 0.27 mmol) was added to a solution of compound **12d** (75 mg, 0.18 mmol) in DME (2 mL). The solution was stirred at 0 °C for 30 min and sulfamoyl chloride (31 mg, 0.27 mmol) was added. The reaction mixture was stirred at room temperature for 3 h. The reaction was quenched with MeOH (5 mL) and the mixture was evaporated to dryness. The residue was purified by flash chromatography (30:1 to 10:1 CHCl<sub>3</sub>/MeOH) to afford compound **13d** as a white solid (69 mg, 78%). <sup>1</sup>H NMR (500 MHz, Methanol-*d*<sub>4</sub>) δ 8.30 (s, 1H), 8.22 (s, 1H), 6.19 (d, *J* = 4.5 Hz, 1H), 4.79 (t, *J* = 4.7 Hz, 1H), 4.75 (t, *J* = 4.6 Hz, 1H), 4.55 (d, *J* = 1.9 Hz, 2H), 4.45 (dd, *J* = 12.2, 5.0 Hz, 1H), 4.34 – 4.28 (m, 2H), 0.97 (s, 9H), 0.20 (s, 6H). <sup>13</sup>C NMR (125 MHz, Methanol-*d*<sub>4</sub>) δ 157.2, 153.9, 150.3, 140.9, 120.5, 117.0, 87.9, 83.8, 82.8, 71.7, 68.6, 56.8, 26.1, 18.8, -4.7, -4.9. HRMS (ESI<sup>-</sup>): [M-H]<sup>-</sup> calcd for C<sub>18</sub>H<sub>28</sub>N<sub>7</sub>O<sub>6</sub>SSi, 498.1591; found, 498.1582.

**((2*R*,3*R*,4*R*,5*R*)-5-(6-Amino-9*H*-purin-9-yl)-3-hydroxy-4-methoxytetrahydrofuran-2-yl)methyl (*L*-phenylalanyl)sulfamate (**4**)**

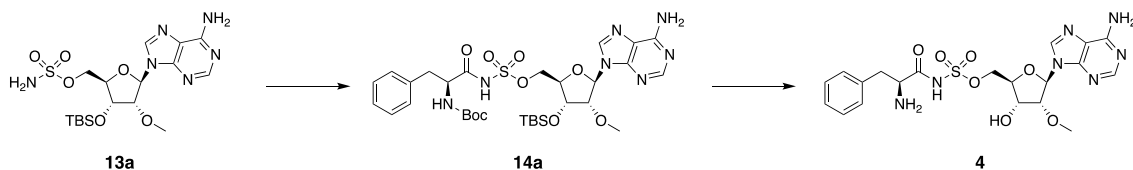

Boc-Phe-OSu (33 mg, 0.09 mmol) and Cs<sub>2</sub>CO<sub>3</sub> (59 mg, 0.18 mmol) were added to a solution of compound **13a** (30 mg, 0.06 mmol) in DMF (1.0 mL). The solution was stirred at room temperature for 2 h. The reaction mixture was diluted with EtOAc. The mixture was washed with 5% citric acid, 5% NaHCO<sub>3</sub>, and brine. The organic layer was dried over Na<sub>2</sub>SO<sub>4</sub> and evaporated to dryness. The residue was used to next step without further purifications. Crude compound **14a** was dissolved in a 4:1 (v/v) mixture of TFA and H<sub>2</sub>O at room temperature. After 6 h, the flask was placed on the rotary evaporator and the TFA and H<sub>2</sub>O were removed at reduced pressure. The residue was purified by flash chromatography (10:1 to 5:1 CHCl<sub>3</sub>/MeOH) to afford compound **4** as a white solid (29 mg, 95%). <sup>1</sup>H NMR (500 MHz, Methanol-*d*<sub>4</sub>) δ 8.49 (s, 1H), 8.20 (s, 1H), 7.29 – 7.23 (m, 4H), 7.20 – 7.14 (m, 1H), 6.17 (d, *J* = 4.7 Hz, 1H), 4.48 (t, *J* = 4.8 Hz, 1H), 4.37 (dd, *J* = 11.3, 2.9 Hz, 1H), 4.34 – 4.24 (m, 3H), 3.91 (dd, *J* = 8.2, 4.9 Hz, 1H), 3.50 (s, 3H), 3.04 (dd, *J* = 14.4, 8.2 Hz, 1H), 2.90 (dd, *J* = 14.0, 8.5 Hz, 1H). <sup>13</sup>C NMR (125 MHz, Methanol-*d*<sub>4</sub>) δ 175.6, 157.2, 154.0, 150.6, 141.1, 136.6, 130.6, 130.6, 129.9, 129.9, 128.4, 128.3, 120.1, 87.6, 85.0, 84.3, 70.6, 68.9, 59.0, 58.3, 38.6. HRMS (ESI<sup>-</sup>): [M-H]<sup>-</sup> calcd for C<sub>20</sub>H<sub>24</sub>N<sub>7</sub>O<sub>7</sub>S, 506.1458; found, 506.1441.

**((2*R*,3*R*,4*R*,5*R*)-5-(6-Amino-9*H*-purin-9-yl)-4-(benzyloxy)-3-hydroxytetrahydrofuran-2-yl)methyl (*L*-phenylalanyl)sulfamate (**5**)**

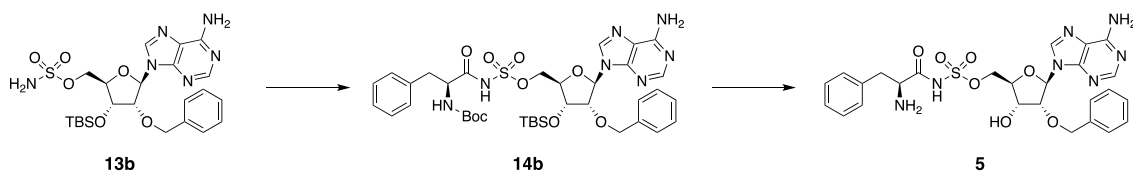

Boc-Phe-OSu (30 mg, 0.08 mmol) and Cs<sub>2</sub>CO<sub>3</sub> (49 mg, 0.15 mmol) were added to a solution of compound **13b** (30 mg, 0.05 mmol) in DMF (1.0 mL). The solution was stirred at room temperature for 1 h. The reaction mixture was diluted with EtOAc. The mixture was washed with 5% citric acid, 5% NaHCO<sub>3</sub>, and brine. The organic layer was dried over Na<sub>2</sub>SO<sub>4</sub> and evaporated to dryness. The residue was used to next step without further purifications. Crude compound **14b** was dissolved in a 4:1 (v/v) mixture of TFA and H<sub>2</sub>O at room temperature. After 6 h, the flask

was placed on the rotary evaporator and the TFA and H<sub>2</sub>O were removed at reduced pressure. The residue was purified by flash chromatography (10:1 to 5:1 CHCl<sub>3</sub>/MeOH) to afford compound **5** as a white solid (30 mg, 94%). <sup>1</sup>H NMR (500 MHz, Methanol-*d*<sub>4</sub>) δ 8.39 (s, 1H), 8.20 (s, 1H), 7.31 – 7.26 (m, 2H), 7.26 – 7.18 (m, 4H), 7.18 – 7.06 (m, 4H), 6.16 (d, *J* = 4.8 Hz, 1H), 4.77 (d, *J* = 12.2 Hz, 1H), 4.60 (d, *J* = 12.2 Hz, 1H), 4.48 (t, *J* = 4.9 Hz, 1H), 4.43 (t, *J* = 4.6 Hz, 1H), 4.41 – 4.28 (m, 3H), 3.96 (dd, *J* = 7.9, 5.1 Hz, 1H), 3.31 – 3.27 (m, 1H), 3.08 (dd, *J* = 14.4, 7.9 Hz, 1H). <sup>13</sup>C NMR (126 MHz, Methanol-*d*<sub>4</sub>) δ 175.1, 155.2, 150.9, 150.0, 141.9, 138.8, 136.3, 130.7, 129.9, 129.2, 129.1, 128.8, 128.4, 120.0, 88.1, 84.5, 82.7, 73.6, 70.7, 69.0, 58.1, 38.4. HRMS (ESI<sup>-</sup>): [M-H]<sup>-</sup> calcd for C<sub>26</sub>H<sub>28</sub>N<sub>7</sub>O<sub>7</sub>S, 582.1771; found, 582.1749.

**((2*R*,3*R*,4*R*,5*R*)-5-(6-Amino-9*H*-purin-9-yl)-4-(cyanomethoxy)-3-hydroxytetrahydrofuran-2-yl)methyl (*L*-phenylalanyl)sulfamate (**7**)**

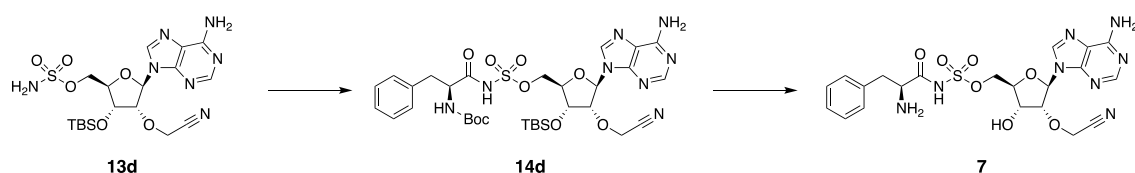

Boc-Phe-OSu (33 mg, 0.09 mmol) and Cs<sub>2</sub>CO<sub>3</sub> (59 mg, 0.18 mmol) were added to a solution of compound **13d** (30 mg, 0.06 mmol) in DMF (1.0 mL). The solution was stirred at room temperature for 1 h. The reaction mixture was diluted with EtOAc. The mixture was washed with 5% citric acid, 5% NaHCO<sub>3</sub>, and brine. The organic layer was dried over Na<sub>2</sub>SO<sub>4</sub> and evaporated to dryness. The residue was used to next step without further purifications. Crude compound **14d** was dissolved in a 4:1 (v/v) mixture of TFA and H<sub>2</sub>O at room temperature. After 6 h, the flask was placed on the rotary evaporator and the TFA and H<sub>2</sub>O were removed at reduced pressure. The residue was purified by flash chromatography (10:1 to 5:1 CHCl<sub>3</sub>/MeOH) to afford compound **7** as a white solid (28 mg, 88%). <sup>1</sup>H NMR (500 MHz, Methanol-*d*<sub>4</sub>) δ 8.55 (s, 1H), 8.26 (s, 1H), 7.33 – 7.25 (m, 4H), 7.23 – 7.15 (m, 1H), 6.22 (d, *J* = 4.6 Hz, 1H), 4.69 – 4.65 (m, 1H), 4.61 (d, *J* = 8.0 Hz, 2H), 4.54 (t, *J* = 4.7 Hz, 1H), 4.37 (dd, *J* = 12.0, 3.4 Hz, 1H), 4.33 – 4.28 (m, 2H), 3.92 (dd, *J* = 8.3, 4.8 Hz, 1H), 3.05 (dd, *J* = 14.5, 8.3 Hz, 1H). <sup>13</sup>C NMR (125 MHz, Methanol-*d*<sub>4</sub>) δ 175.0, 155.8, 151.8, 150.4, 141.7, 136.5, 130.6, 130.0, 128.5, 120.2, 117.4, 87.7, 84.4, 84.2, 70.6, 68.5, 58.2, 57.1, 38.5. HRMS (ESI<sup>-</sup>): [M-H]<sup>-</sup> calcd for C<sub>21</sub>H<sub>23</sub>N<sub>8</sub>O<sub>7</sub>S, 531.1410; found, 531.1437

## Chemical biology procedures

**Protein expression and purification:** Recombinant protein *holo*-GrsA were expressed and purified as previously described.<sup>4,5</sup> This protein was overproduced and isolated as a C-terminal His-tagged construct using the *Escherichia coli* overexpression strain, BL21 (DE3), kindly provided by Prof. Mohamed A. Marahiel at Philipps-Universität Marburg, Germany.

**Preparation of proteomes for in vitro labeling experiments:** *Aneurinibacillus migulanus* ATCC 9999 was cultured and the whole cell lysate was isolated as described previously.<sup>4</sup>

**Determination of  $K_d$  values of inhibitors by the competitive ELISA assay<sup>2</sup>:** Prior to carrying out the competitive ELISA, the optimum enzyme concentration and the incubation time on streptavidin high binding capacity Coated 96-well plates (Thermo Fisher Scientific K.K.) (precoated with 1.5  $\mu\text{g}/\text{mL}$  of L-Phe-AMS-biotin, structure are shown in Figure S2) were determined to establish a reproducible titration curve. In our experiments, the final concentration and the incubation time were typically 0.875  $\mu\text{g}/\text{mL}$  (6.89 nM) of GrsA and 15–20 min.<sup>2</sup> Competitive ELISA experiments were conducted as follows: a 60- $\mu\text{L}$  solution of each inhibitor in 20 mM Tris (pH 8.0), 1 mM  $\text{MgCl}_2$ , 1 mM TCEP and 0.0025% NP-40 was serially diluted 2-fold across a 96-well flat-bottom plate (Corning) containing 60  $\mu\text{L}$  of buffer per well. To each well, 60  $\mu\text{L}$  of enzyme solution (final concentration was preadjusted) was added to each well, and the mixture was equilibrated for 1 h at room temperature. Determination of the  $K_d$  values of inhibitors **4**, **5**, and **7** for GrsA was conducted as follows. Final reaction concentrations: GrsA (0.875  $\mu\text{g}/\text{mL}$ , 6.89 nM) and **4**, **5**, or **7** (6.1 nM to 100  $\mu\text{M}$ ). Control samples (DMSO alone) were incubated under the same conditions. In all the experiments, the total DMSO concentration was maintained at or below 2.0%. The resulting enzyme-inhibitor solutions (100  $\mu\text{L}$ ) from each well were transferred to wells treated with probes and incubated for 15–20 min. After extensive washing with 200  $\mu\text{L}$  of PBST, wells were treated with a solution of 100  $\mu\text{L}$  of an anti-6 $\times$  His, monoclonal antibody (9C11, Wako Pure Chemical Industries, Ltd.) (1:5000 in PBST) for 1 h at room temperature. After three washes with 200  $\mu\text{L}$  of PBST, a solution of 100  $\mu\text{L}$  of goat anti-mouse-HRP conjugate (Bio-Rad Laboratories, Inc.) (1:5000 in PBST), was incubated for 1 h at room temperature, followed by three washes with 200  $\mu\text{L}$  of PBST, and each well was then treated with 100  $\mu\text{L}$  of 0.4 mg/mL *o*-phenylenediamine (OPD) in 0.05 M phosphate- citrate (pH 5.0) containing 0.4 mg/mL urea hydrogen peroxide at room temperature. The yellow color was allowed to develop for approximately 5 min and the reaction was quenched by the addition of 50  $\mu\text{L}$  of 1 M  $\text{H}_2\text{SO}_4$ . The absorbance at 492 nm was measured using an EnVision Multilabel Reader (PerkinElmer). The results were analyzed using a Klotz plot (a double reciprocal plot of the inhibition concentration vs. the ratio of inhibitor-bound enzyme to the total added enzyme) and the slope of the line yielding the  $K_d$  for the inhibitor. All assays were performed in duplicates.

**Competitive labeling of recombinant GrsA by probe 3:** In a manner similar to literature<sup>10</sup>, recombinant GrsA (1  $\mu$ M) was incubated with inhibitors **1**, **2**, or **4–9** or DMSO for 10 min at room temperature in 20 mM Tris (pH 8.0) 1 mM MgCl<sub>2</sub>, 1 mM TCEP, and 0.0025% NP-40 in a 96-well plate. The mixtures were treated with probe **3** (1  $\mu$ M from a 100  $\mu$ M stock in DMSO). After 10 min at room temperature, the plate was placed on ice and exposed to 365 nm light for 30 min using a UV lamp (8 W) (UVP Crosslinker, Analytik Jena) at 1 cm distance from the top of the plate (without the lid). In all experiments, the total DMSO concentration was kept at 2.2%. To initiate the Click reaction, TAMRA-N<sub>3</sub>, TCEP, TBTA, and CuSO<sub>4</sub> were added in the final concentrations of 100  $\mu$ M, 1 mM, 100 mM, and 1 mM, respectively. After 1 h at room temperature, 5 $\times$  SDS-loading buffer (strong reducing) was added, and the samples were heated at 95 °C for 5 min. Samples were then separated by 1D SDS-PAGE and fluorescence gel visualization was performed using a Typhoon 9410 Gel and Blot Imager ( $\lambda_{\text{ex}} = 532$  nm and  $\lambda_{\text{em}} = 580$  nm) (GE Healthcare).

**In vitro labeling of endogenous GrsA:** In a manner similar to literature<sup>10</sup>, *A. migulanus* ATCC 9999 proteome (2 mg/mL) was treated with probe **3** (1  $\mu$ M from a 100  $\mu$ M stock in DMSO) in 20 mM Tris (pH 8.0), 1 mM MgCl<sub>2</sub>, 1 mM TCEP, 0.05% Igepal CA-630, 0.2 mg/mL lysozyme, and protease inhibitor cocktail in a 96-well plate. Inhibition studies were performed by pre-incubation of *A. migulanus* ATCC 9999 proteome (2.0 mg/mL) with inhibitors **1**, **2**, or **4–9** (100  $\mu$ M from a 10 mM stock in DMSO) for 10 min at room temperature. In all experiments, the total DMSO concentration was kept at 2.2%. After 10 min at room temperature, the plate was placed on ice and exposed to 365 nm light for 30 min using a UV lamp (8 W) (UVP Crosslinker, Analytik Jena) at 1 cm distance from the top of the plate (without the lid), reacted with TAMRA-N<sub>3</sub> at room temperature, and separated by 1D SDS-PAGE. Fluorescent gel visualization was performed using a Typhoon 9410 Gel and Blot Imager ( $\lambda_{\text{ex}} = 532$  nm and  $\lambda_{\text{em}} = 580$  nm) (GE Healthcare).

**Labeling of intracellular GrsA in living bacterial cells:** In a manner similar to literature<sup>10</sup>, *A. migulanus* ATCC 9999 was grown at 37 °C in YPG medium. Cultures (24 h, OD<sub>600</sub> = 36) were harvested, aliquoted to Eppendorf 1.5 mL tubes, washed twice with 1 mL of PBS, resuspended in 1 mL of PBS, and treated with probe **3** (1  $\mu$ L, 10  $\mu$ M from a 10 mM stock in DMSO) in either the absence or presence of inhibitors **1**, **2**, or **4–9** (10 or 100  $\mu$ M from a 1 or 10 mM stock in DMSO). In all experiments, the DMSO concentration was maintained at a level of 0.1%. After 10 min at room temperature, the bacterial cells were harvested, washed twice with 1 mL of PBS, resuspended in 500  $\mu$ L of PBS, and transferred into a 96-well plate (100  $\mu$ L each). The plate was placed on ice and exposed to 365 nm light for 30 min using a UV lamp (8 W) (UVP Crosslinker, Analytik Jena) at 1 cm distance from the top of the plate (without the lid). The cells were then harvested by centrifugation and stored in a freezer until use. Proteomes (2 mg/mL) were reacted with TAMRA-N<sub>3</sub> for 1 h at room temperature and separated by gel electrophoresis. Fluorescence gel visualization was performed using a Typhoon 9410 Gel and Blot Imager ( $\lambda_{\text{ex}} = 532$  nm and  $\lambda_{\text{em}} = 580$  nm) (GE Healthcare).

## References

1. Ishikawa, F.; Miyamoto, K.; Konno, S.; Kasai, S.; Takeya, H. Accurate detection of adenylation domain functions in nonribosomal peptide synthetases by an enzyme-linked immunosorbent assay system using active site-directed probes for adenylation domains. *ACS Chem. Biol.* **2015**, *10*, 2816–2826.
2. Ishikawa, F.; Takeya, H. A competitive enzyme-linked immunosorbent assay system for adenylation domains in nonribosomal peptide synthetases. *ChemBioChem* **2016**, *17*, 474–478.
3. Ishikawa, F.; Nohara, M.; Takashima, K.; Tanabe, G. Probing the compatibility of an enzyme-linked immunosorbent assay toward the reprogramming of nonribosomal peptide synthetase adenylation domains. *ChemBioChem* **2020**, *21*, 3056–3061.
4. Ishikawa, F.; Takeya, H. Specific enrichment of nonribosomal peptide synthetase module by an affinity probe for adenylation domains. *Bioorg. Med. Chem. Lett.* **2014**, *24*, 865–869.
5. Konno, S.; Ishikawa, F.; Suzuki, T.; Dohmae, N.; Burkart, M. D.; Takeya, H. Active site-directed proteomic probes for adenylation domains in nonribosomal peptide synthetases. *Chem. Commun.* **2015**, *51*, 2262–2265.
6. Peterson, M. A.; Nilsson, B. L.; Sarker, S.; Doboszewski, B.; Zhang, W.; Robins, M. Amide-linked ribonucleoside dimers derived from 5'-amino-5'-deoxy- and 3'-(carboxymethyl)-3'-deoxynucleoside precursors. *J. Org. Chem.* **1999**, *64*, 8183–8192.
7. Li, J.; Wei, H.; Zhou, M. Structure-guided design of a methyl donor cofactor that controls a viral histone H3 lysine 27 methyltransferase activity. *J. Med. Chem.* **2011**, *54*, 7734–7738.
8. Gottlieb, H. E.; Kotlyar, V.; Nudelman, A. NMR chemical shifts of common laboratory solvents as trace impurities. *J. Org. Chem.* **1997**, *62*, 7512–7515.
9. Still, W. C.; Kahn, A.; Mitra, A. Rapid chromatographic technique for preparative separations with moderate resolution. *J. Org. Chem.* **1978**, *43*, 2923–2925.
10. Ishikawa, F.; Konno, S.; Uchida, C.; Suzuki, T.; Takashima, K.; Dohmae, N.; Takeya, H.; Tanabe, G. Chemoproteomics profiling of surfactin-producing nonribosomal peptide synthetases in living bacterial cells. *Cell. Chem. Biol.* **2022**, *29*, 145–156.



$^1\text{H}$  NMR (500 MHz) and  $^{13}\text{C}$  NMR (125 MHz) spectra of **10d** in methanol- $d_4$

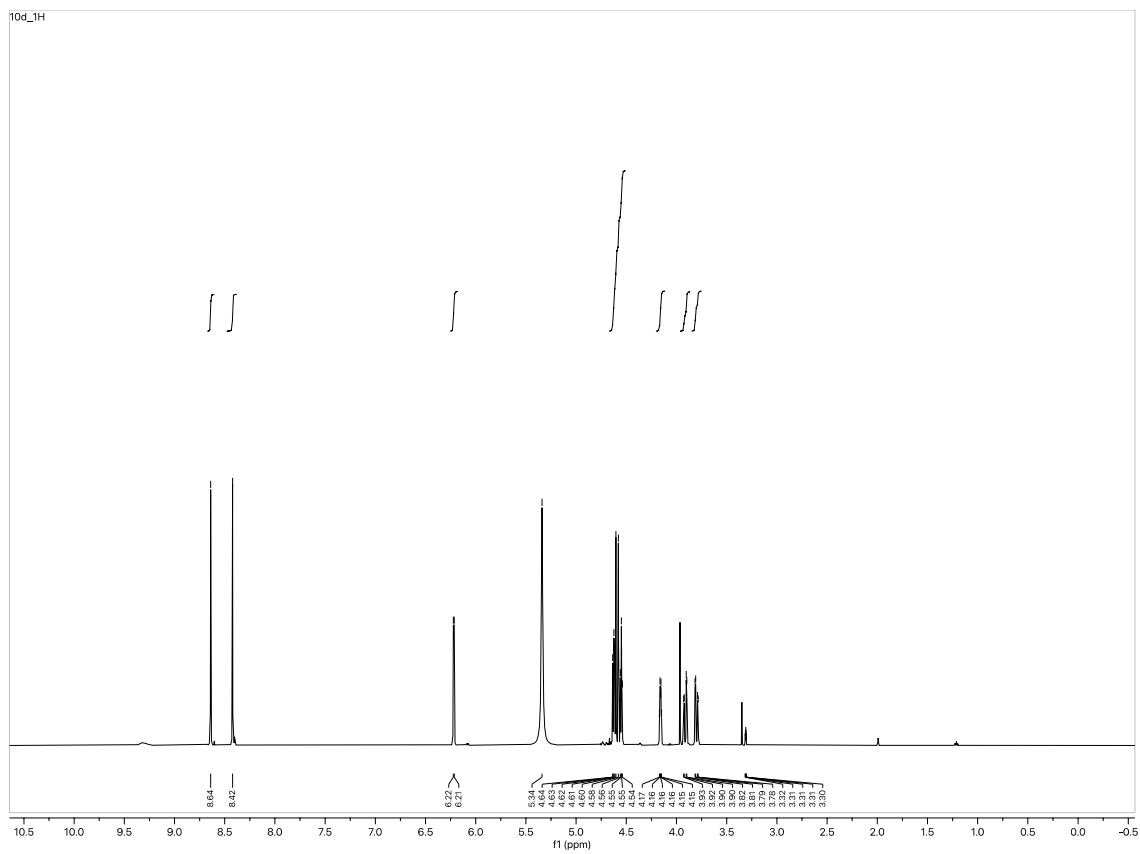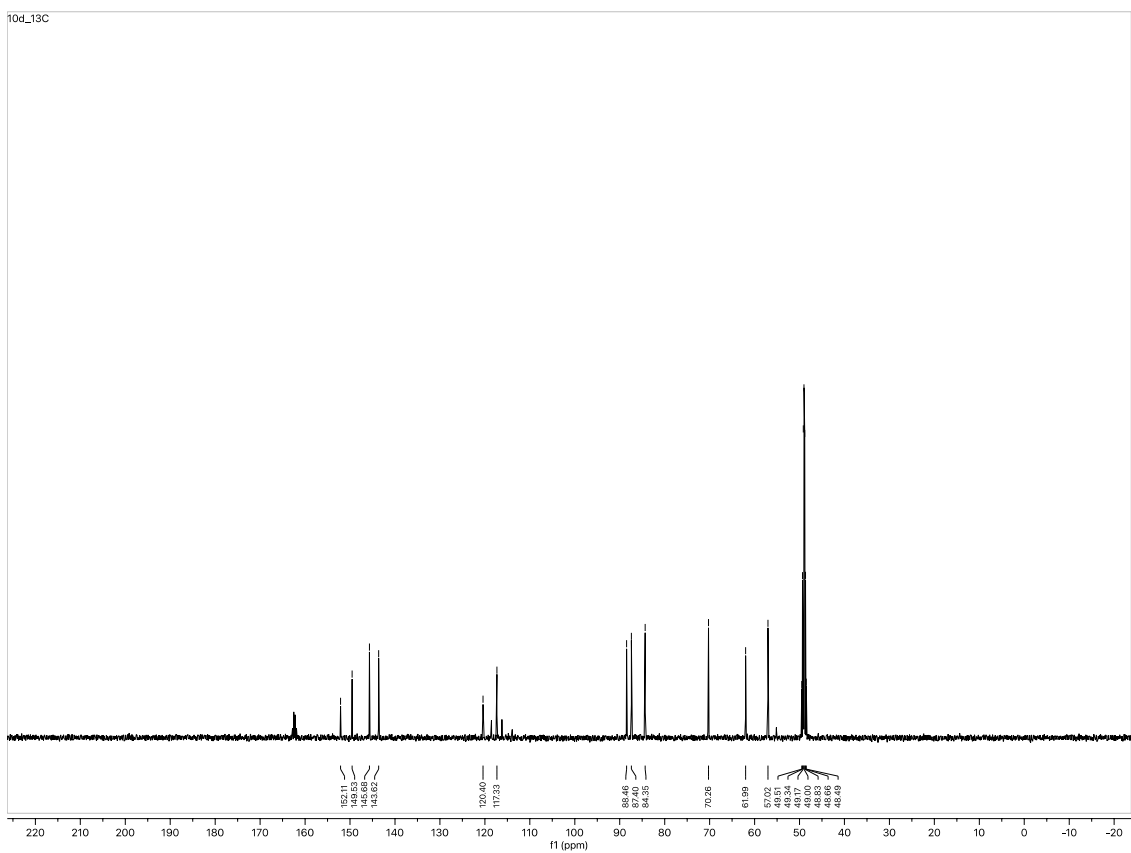

$^1\text{H}$  NMR (500 MHz) and  $^{13}\text{C}$  NMR (125 MHz) spectra of **11b** in  $\text{CDCl}_3$

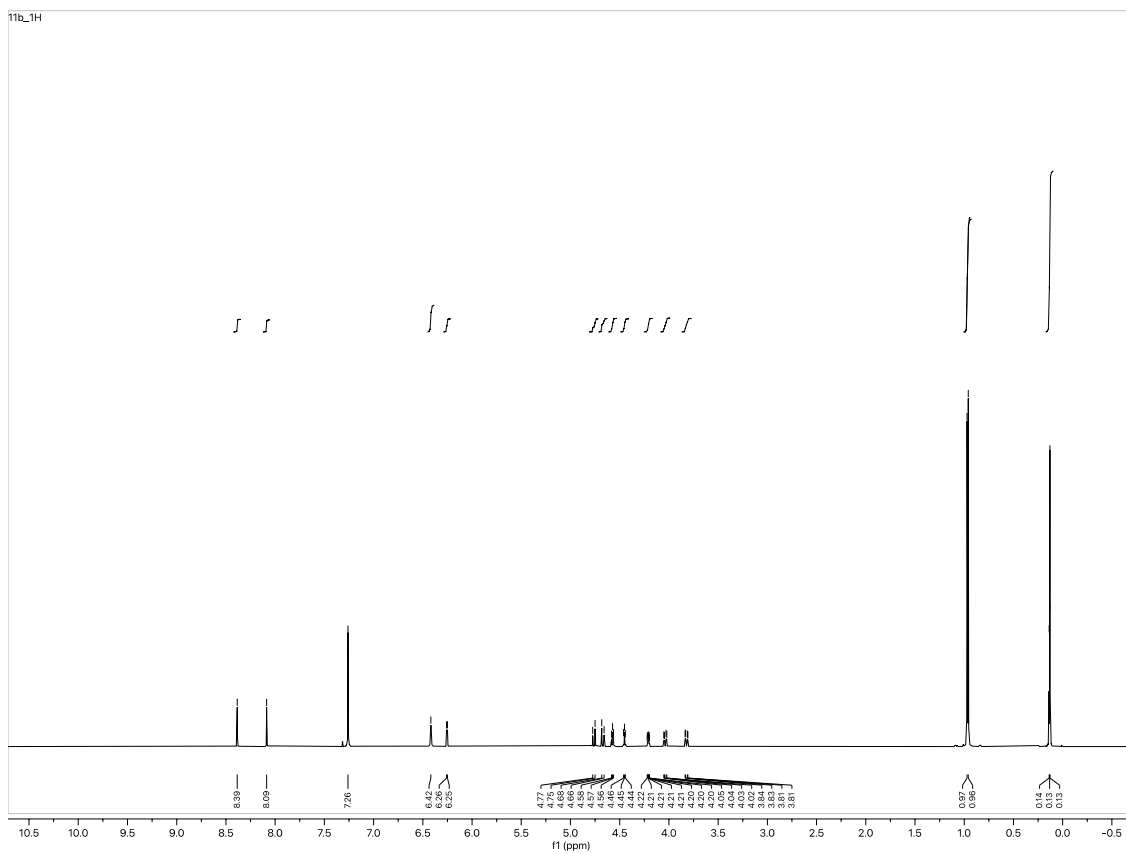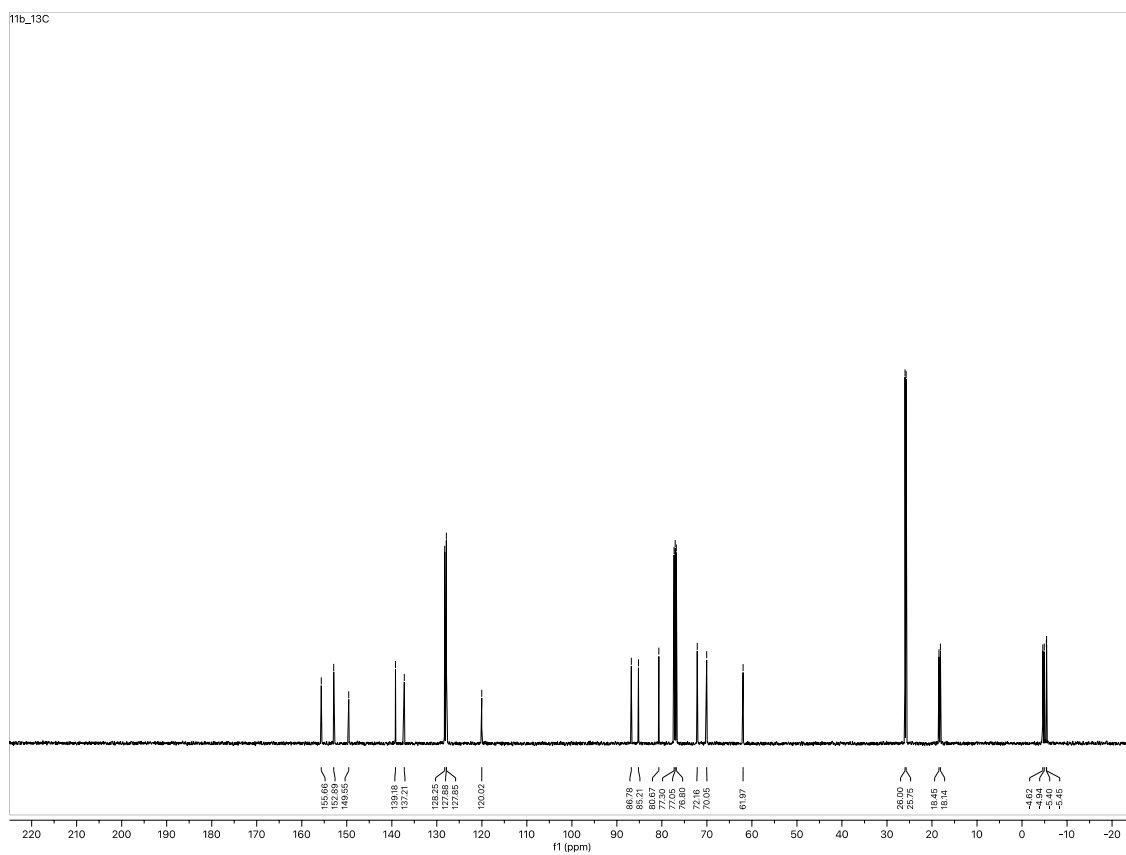

$^1\text{H}$  NMR (500 MHz) and  $^{13}\text{C}$  NMR (125 MHz) spectra of **11d** in  $\text{CDCl}_3$

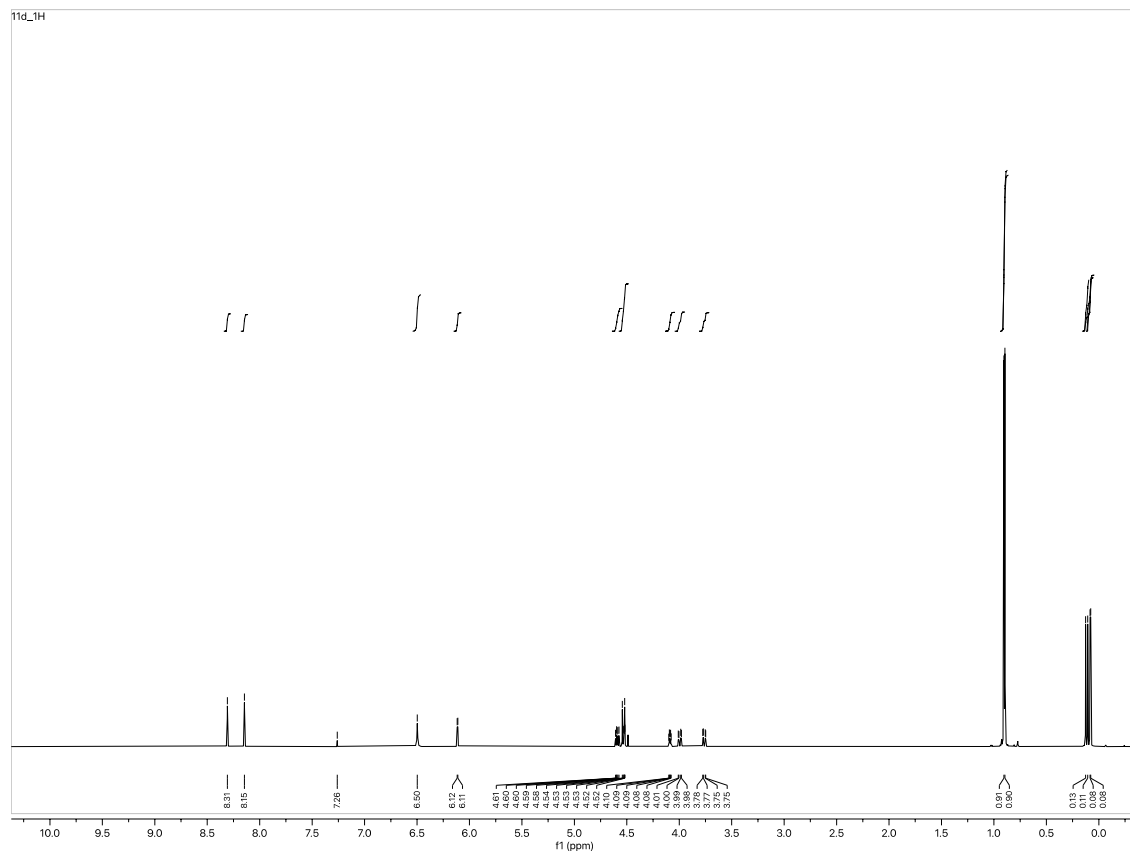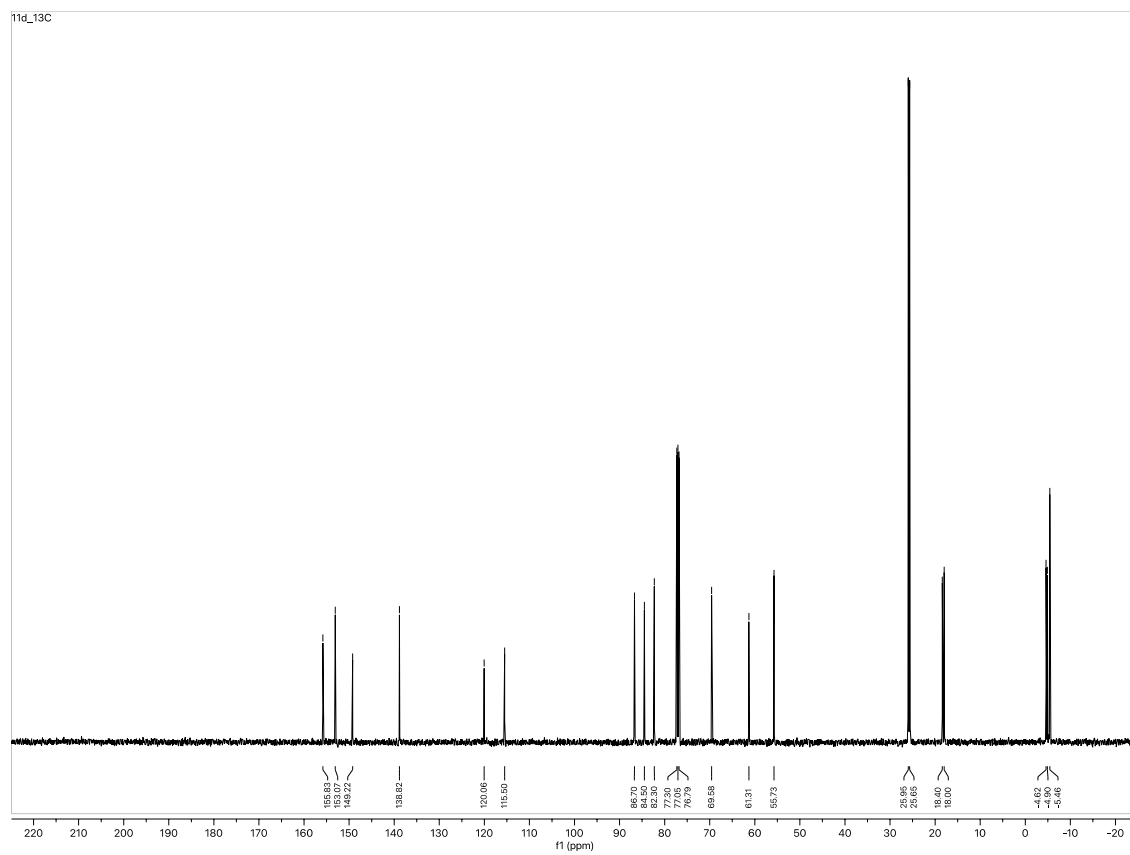

$^1\text{H}$  NMR (500 MHz) and  $^{13}\text{C}$  NMR (125 MHz) spectra of **12b** in  $\text{CDCl}_3$

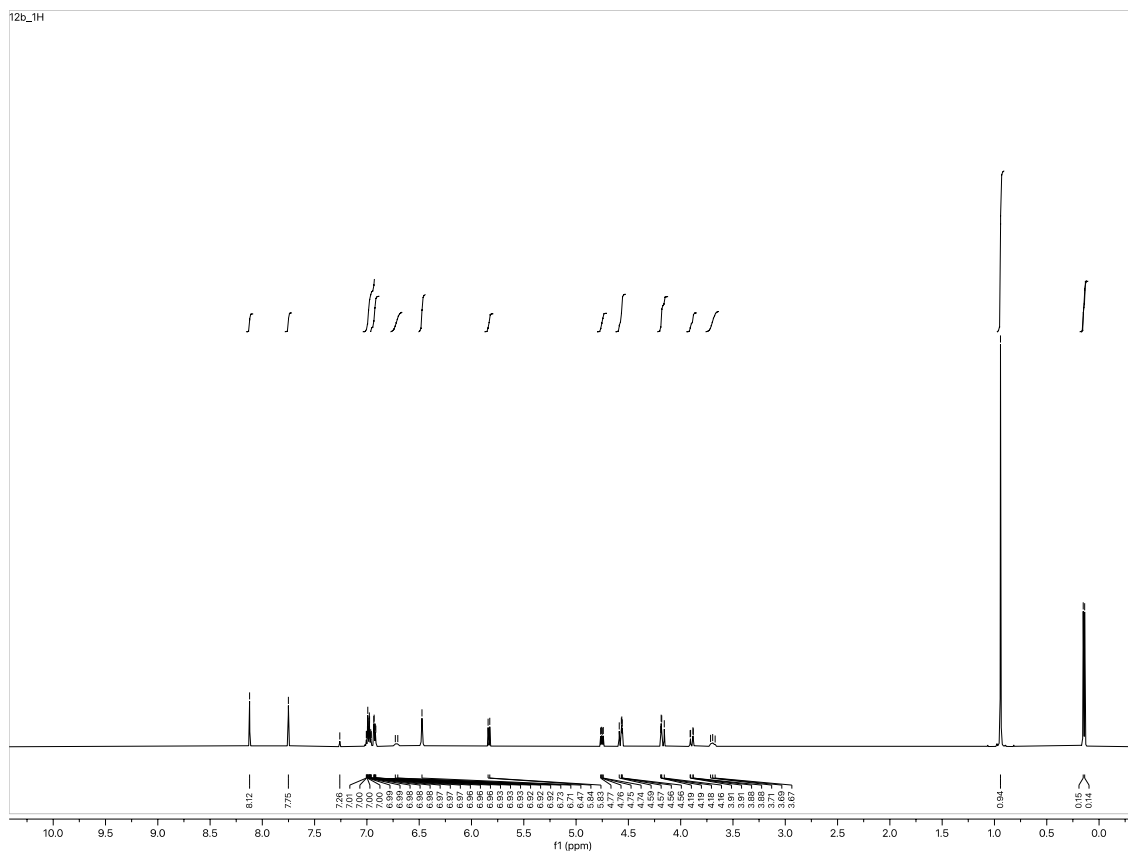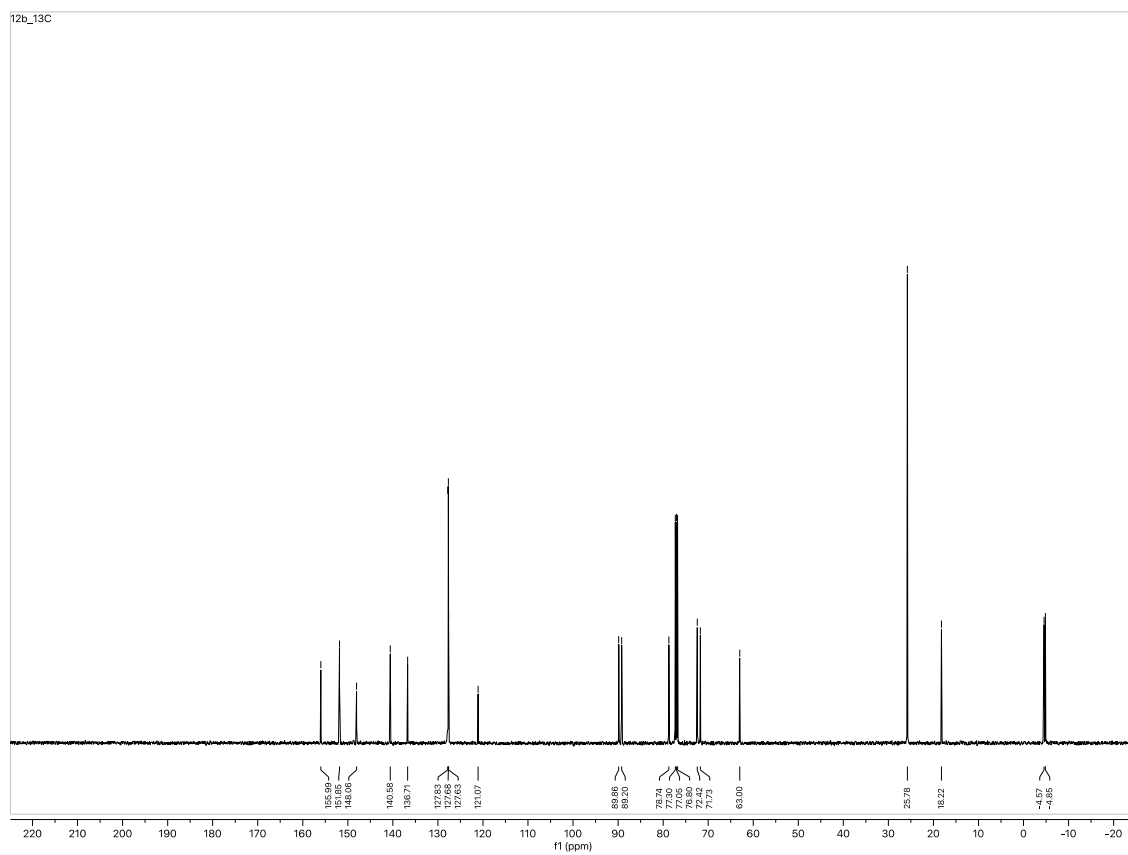

$^1\text{H}$  NMR (500 MHz) and  $^{13}\text{C}$  NMR (125 MHz) spectra of **12d** in  $\text{CDCl}_3$

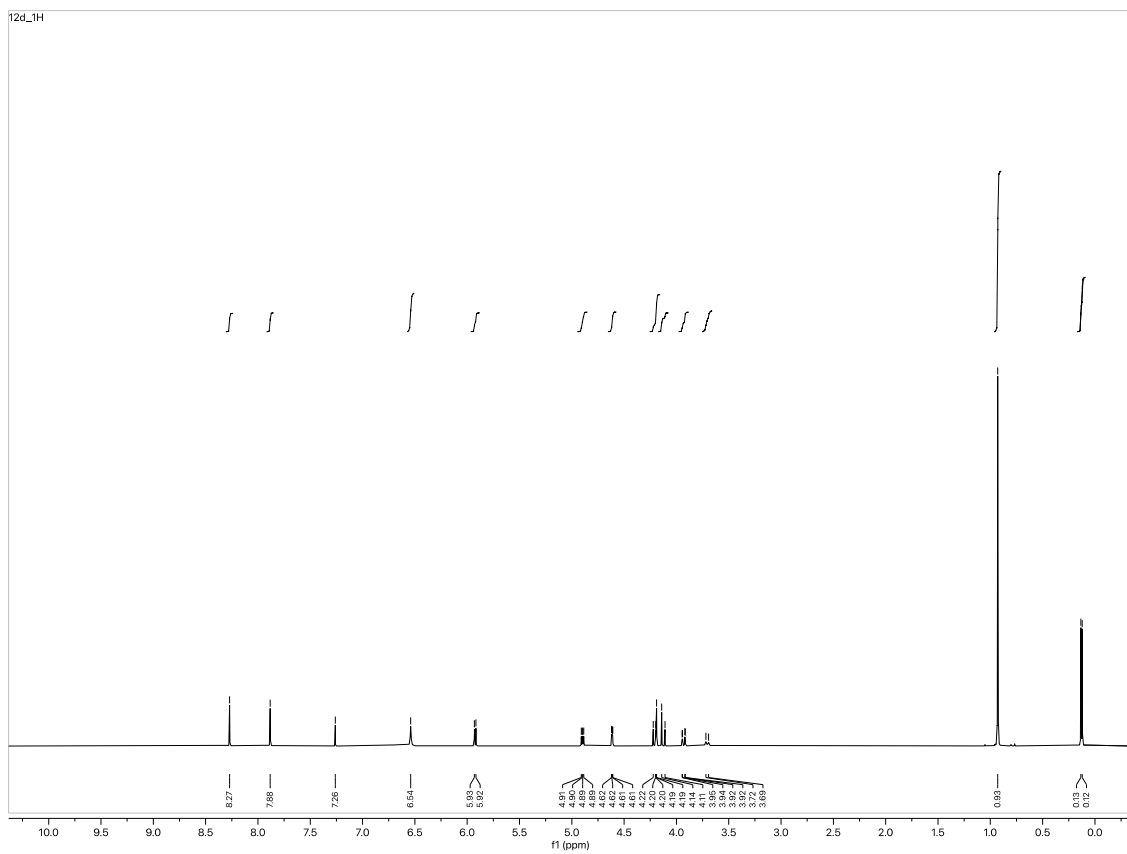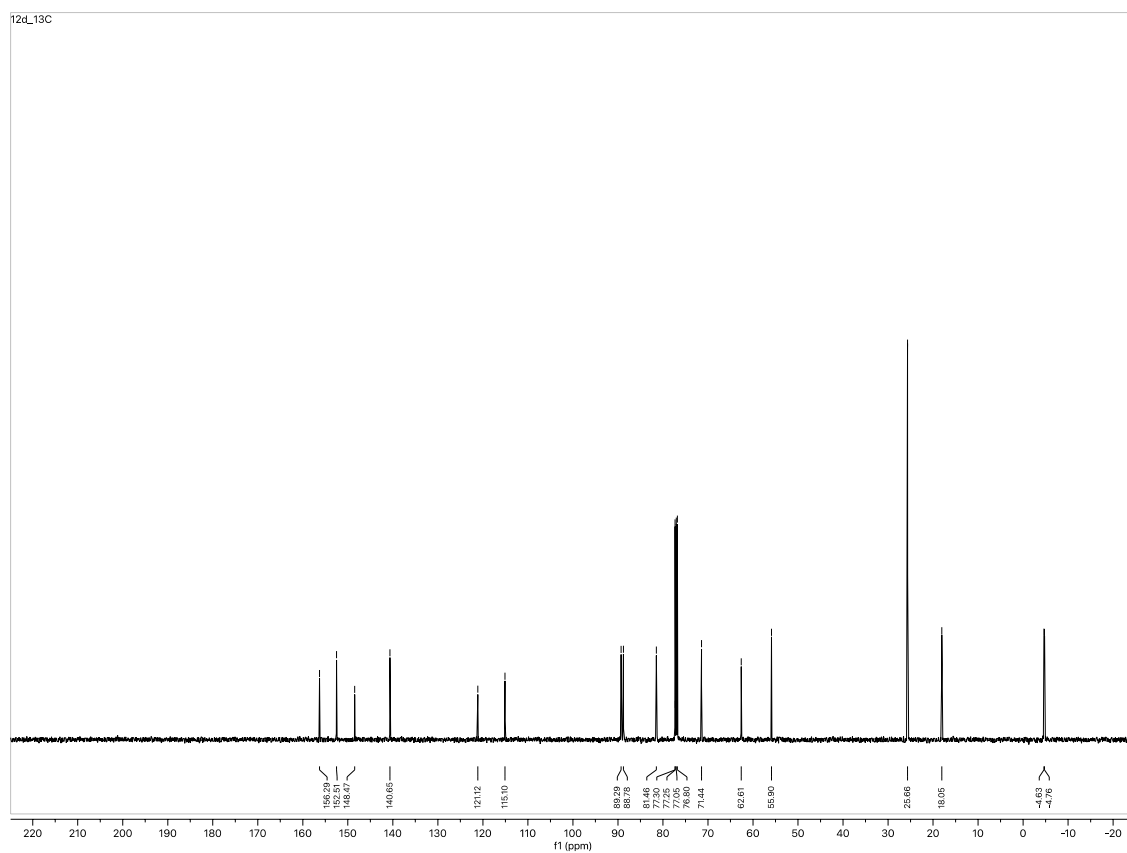

$^1\text{H}$  NMR (500 MHz) and  $^{13}\text{C}$  NMR (125 MHz) spectra of **13a** in methanol- $d_4$

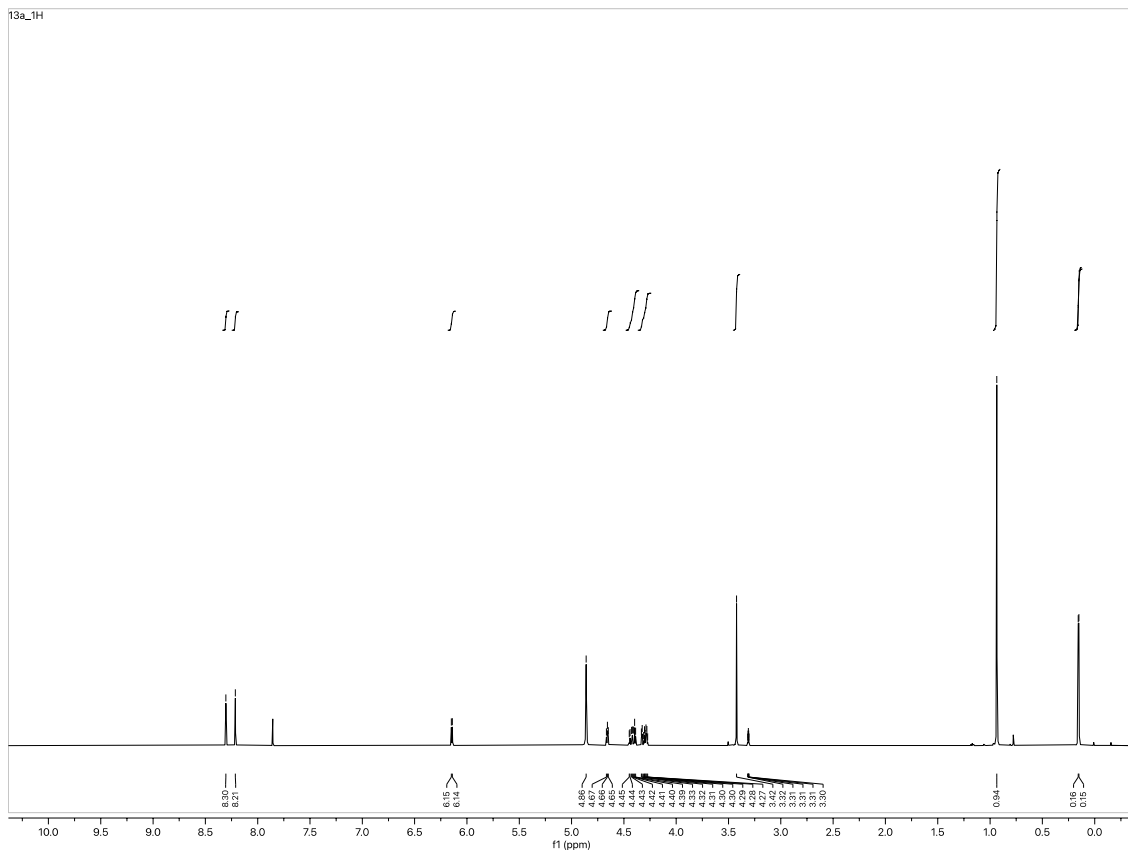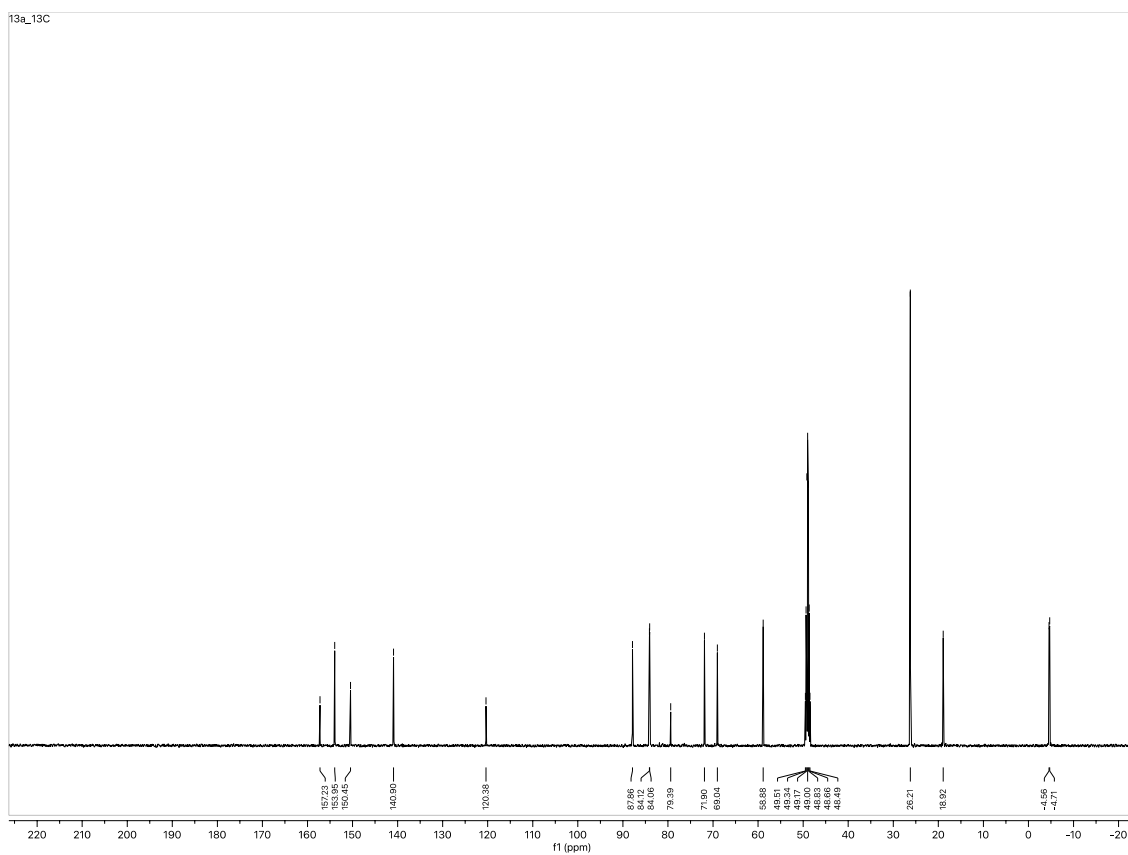

$^1\text{H}$  NMR (500 MHz) and  $^{13}\text{C}$  NMR (125 MHz) spectra of **13b** in methanol- $d_4$

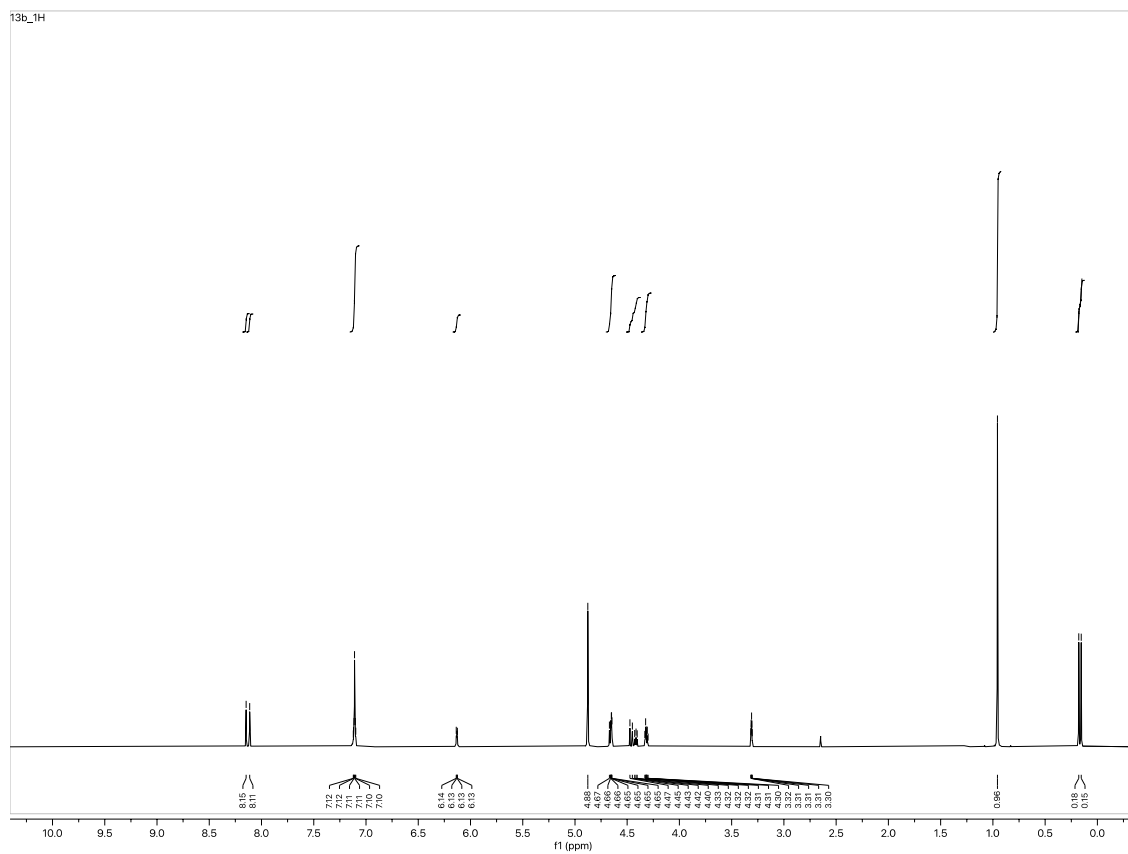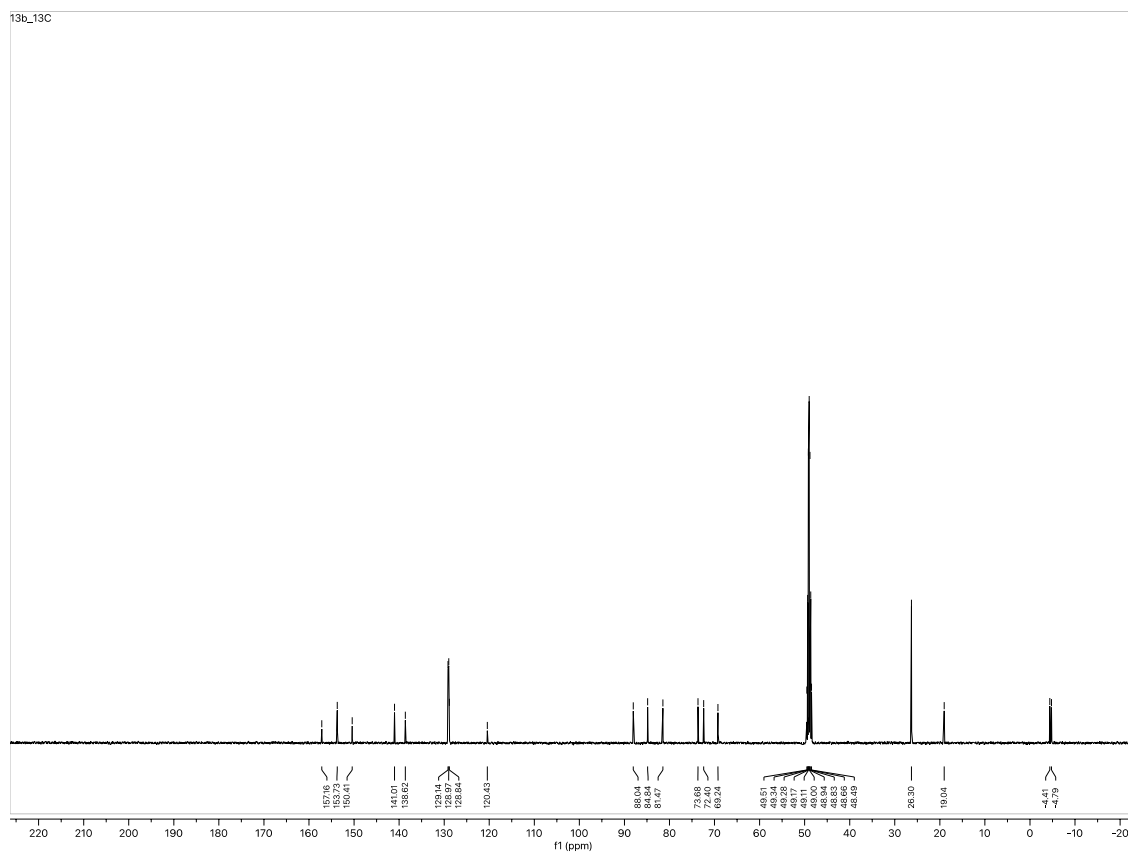

$^1\text{H}$  NMR (500 MHz) and  $^{13}\text{C}$  NMR (125 MHz) spectra of **13d** in methanol- $d_4$

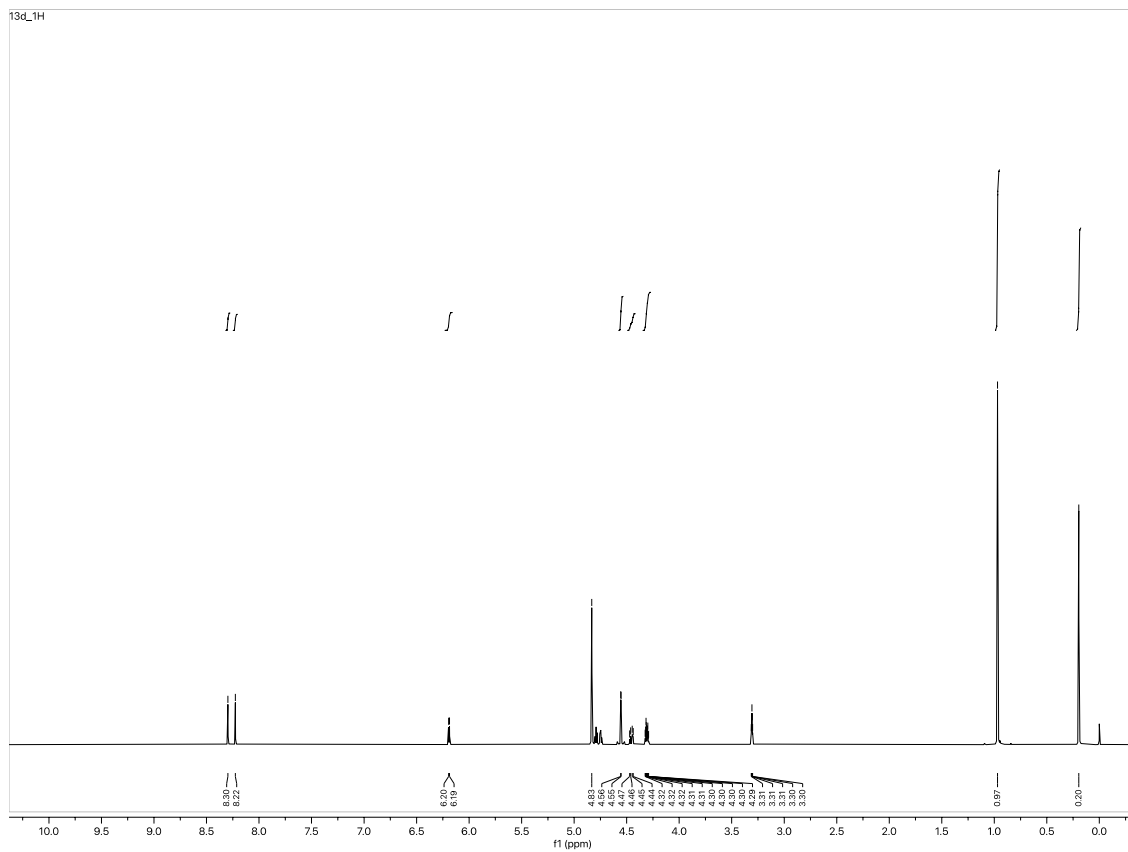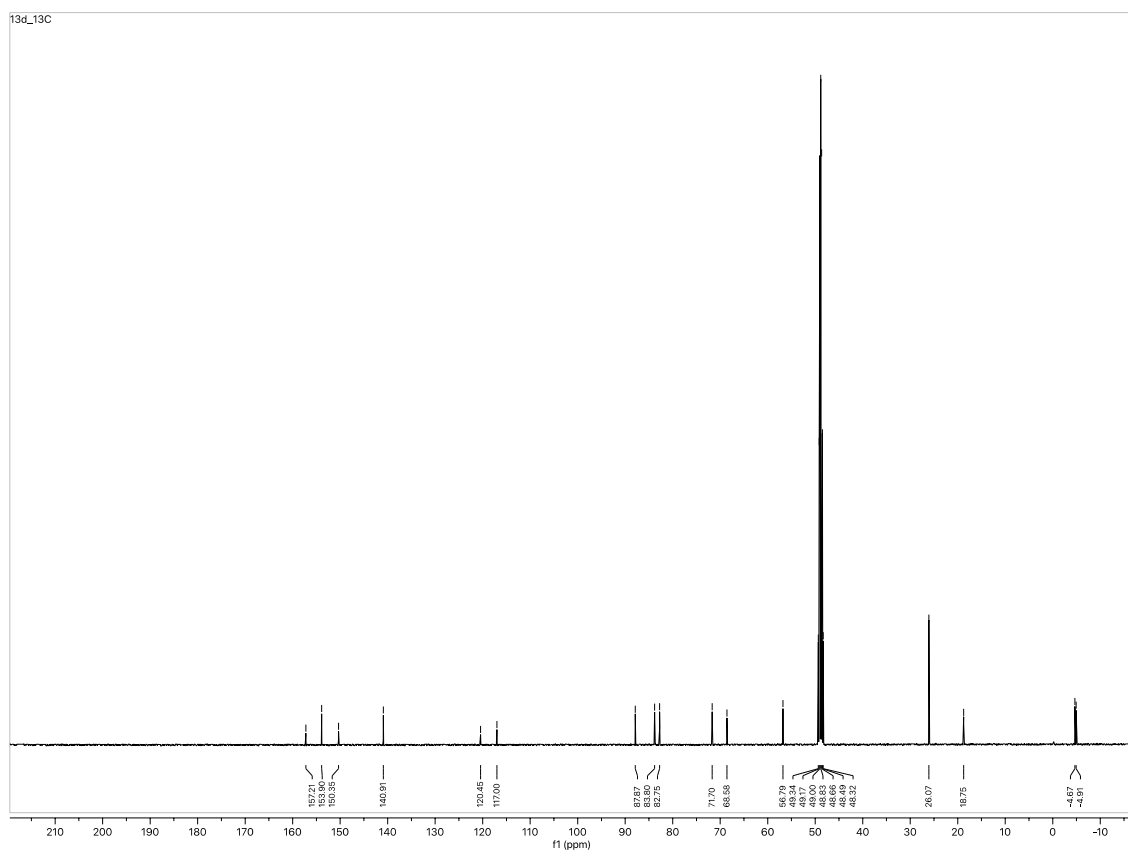



$^1\text{H}$  NMR (500 MHz) and  $^{13}\text{C}$  NMR (125 MHz) spectra of **4** in methanol- $d_4$

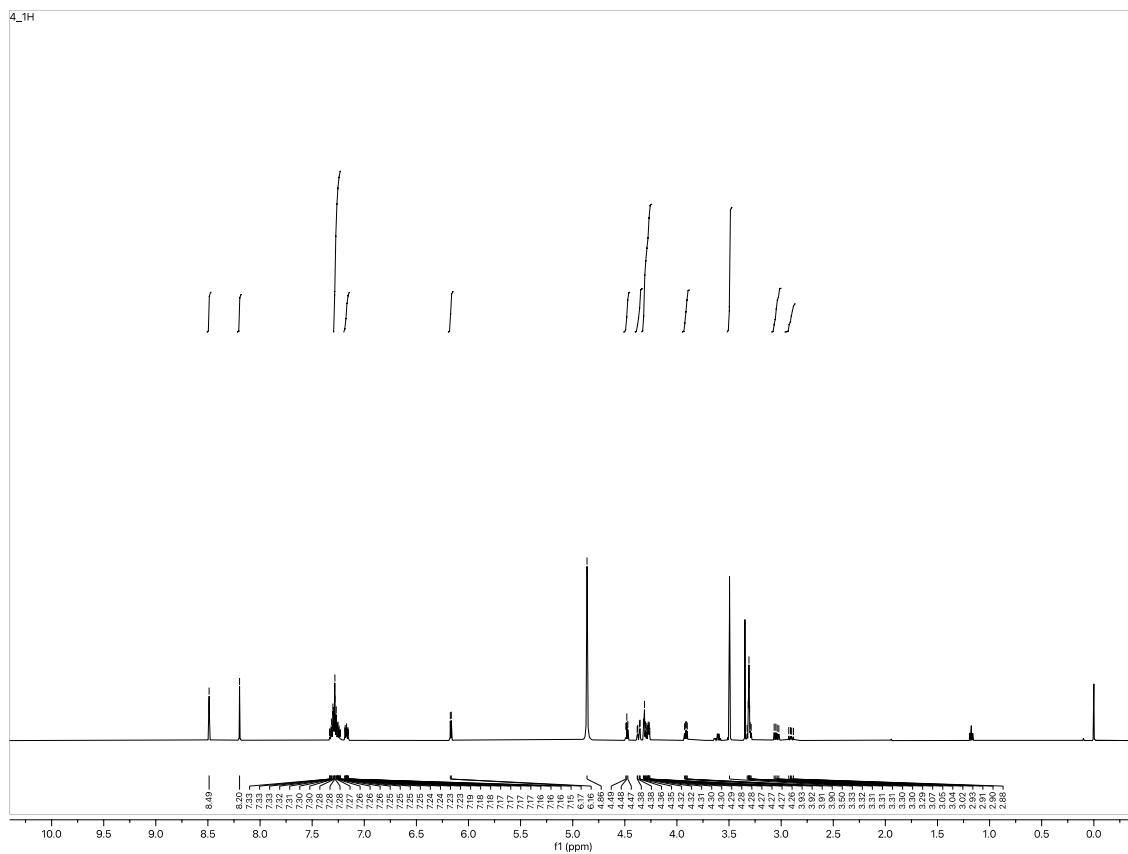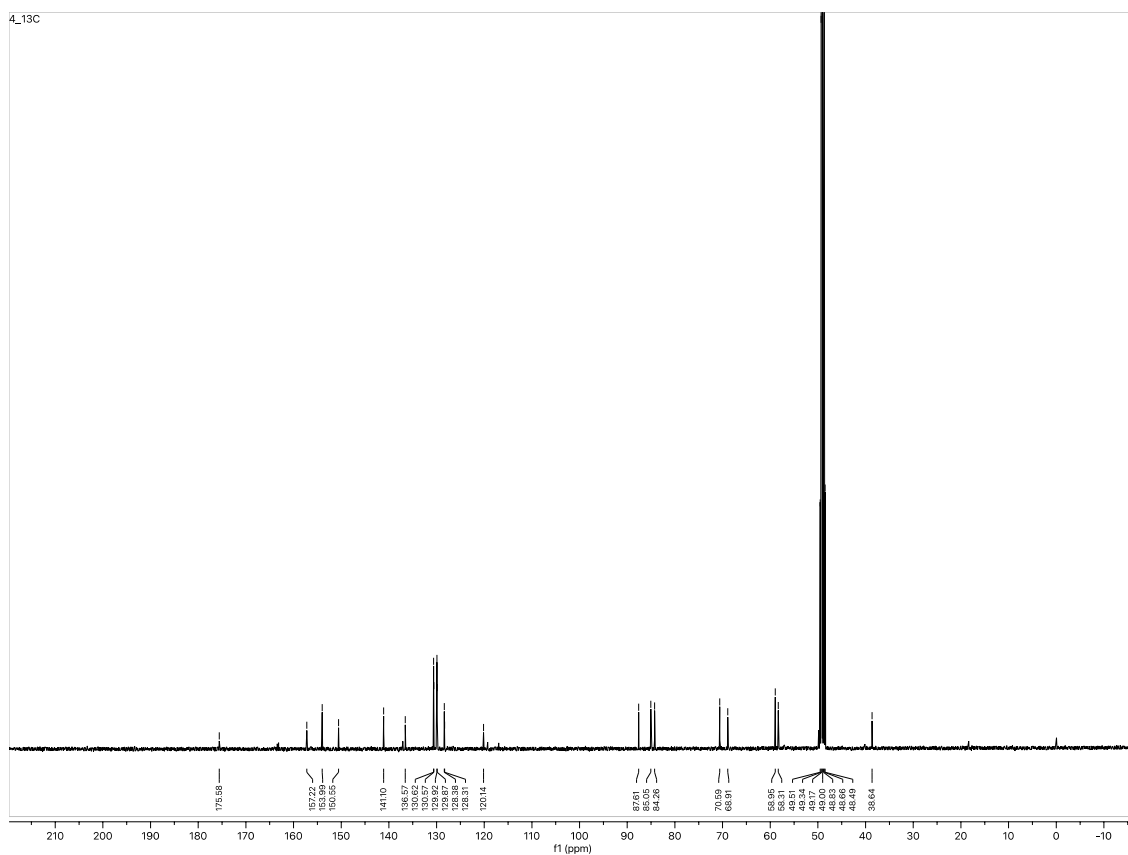

$^1\text{H}$  NMR (500 MHz) and  $^{13}\text{C}$  NMR (125 MHz) spectra of **5** in methanol- $d_4$

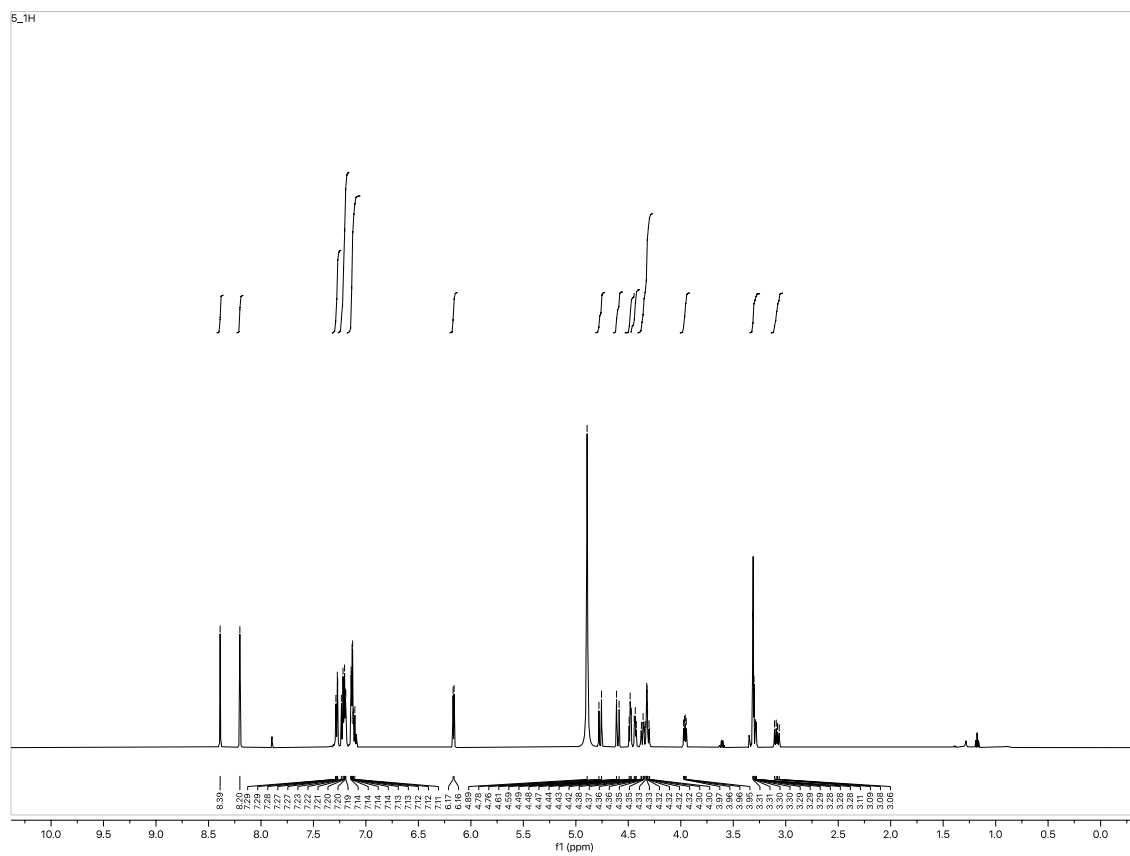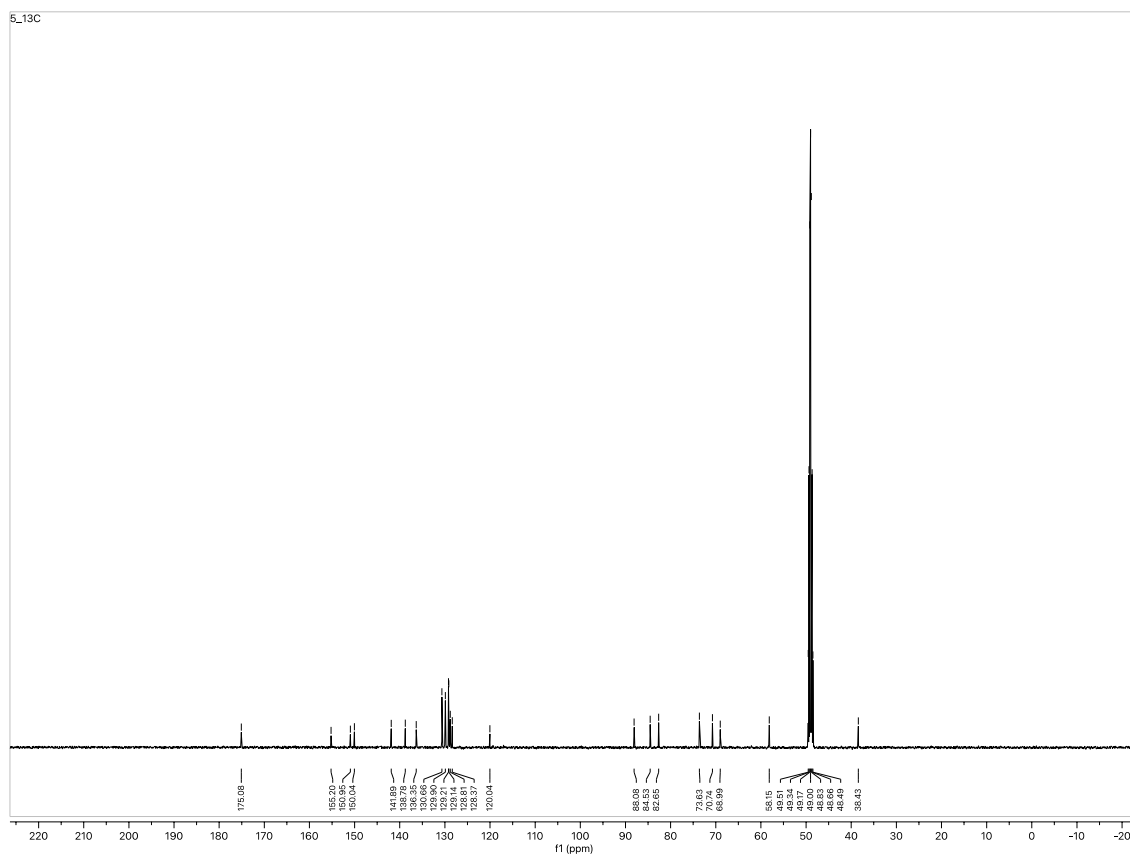

$^1\text{H}$  NMR (500 MHz) and  $^{13}\text{C}$  NMR (125 MHz) spectra of **7** in methanol- $d_4$

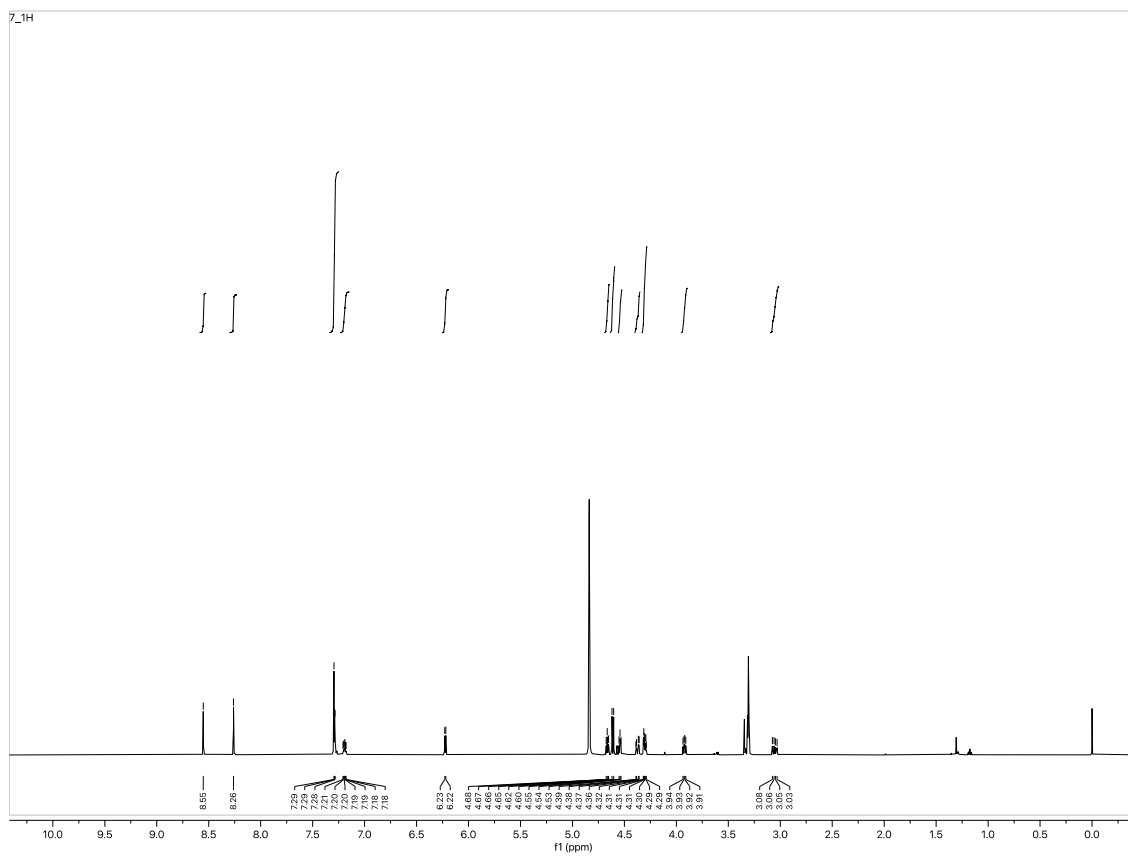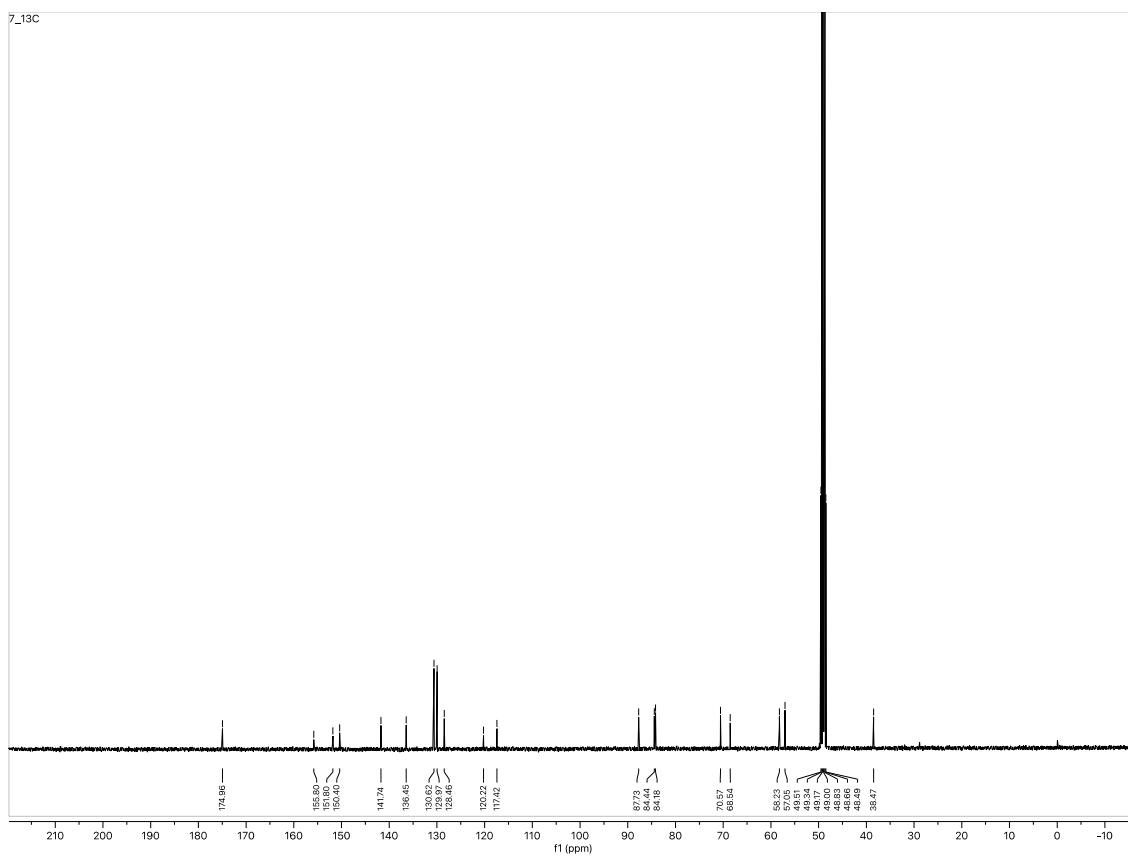

Supplement: Additional file 1 [file 1860-5397-20-39-S1.pdf]
